# Supplementary material for: Stimulation of Oncogene-Specific Tumor-Infiltrating T Cells through Combined Vaccine and αPD-1 Enable Sustained Antitumor Responses against Established HER2 Breast Cancer
Source: Oxford University Press journal article supplement (doi:10.1158/1078-0432.ccr-20-0389), 2020-07-30
Supplement: 10780432ccr200389-sup-236602_2_supp_6323377_qb1xxt.xlsx [file 10780432ccr200389-sup-236602_2_supp_6323377_qb1xxt.xlsx]

## Sheet: S1A
TRUE_filepath	salmon_data_filepath	CP_num	external_code	external_code2	CLID	Model	Sub_Identifier	published	DataRepository
/datastore/nextgenout4/share/labs/bioinformatics/cmp_seq/mouse/rnaseq-output/150501_UNC11-SN627_0398_AC5KENACXX_CTTGTA_L002/88421035-be89-4c8b-af1c-42e2de2761bb/Salmon_out/quant.sf	/datastore/nextgenout4/share/labs/bioinformatics/cmp_seq/mouse/rnaseq-output/150501_UNC11-SN627_0398_AC5KENACXX_CTTGTA_L002/88421035-be89-4c8b-af1c-42e2de2761bb/Salmon_out/quant.sf	CP-2257	KM-280-2153-5mm	KM-280-2153-5mm	CP-2257|KM-280-2153-5mm|180110_UNC18-D00493_0484_BCC2J8ANXX_TGACCA_S20_L005	Balb/c p53-/-	2153	Y	GSE124821-GPL17021
/datastore/nextgenout4/share/labs/bioinformatics/cmp_seq/mouse/rnaseq-output/C9T7VANXX_CCGTCC_136696_S7_L003/9e341e9f-e12b-456b-83ad-65def1a35f25/Salmon_out/quant.sf	/datastore/nextgenout4/share/labs/bioinformatics/cmp_seq/mouse/rnaseq-output/C9T7VANXX_CCGTCC_136696_S7_L003/9e341e9f-e12b-456b-83ad-65def1a35f25/Salmon_out/quant.sf	CP-1975	BalbCp53null-Tumor9263-3-F	BalbCp53null-Tumor9263-3-F	CP-1975|BalbCp53null-Tumor9263-3-F|170313_UNC17-D00216_0431_BCAKCYANXX_GTGGCC_S5_L002	Balb/c p53-/-	9263	Y	GSE124821-GPL17021
/datastore/nextgenout4/share/labs/bioinformatics/cmp_seq/mouse/rnaseq-output/C9T7VANXX_AGTTCC_136693_S11_L004/f3656818-1adf-4262-81b0-dd00254a1c73/Salmon_out/quant.sf	/datastore/nextgenout4/share/labs/bioinformatics/cmp_seq/mouse/rnaseq-output/C9T7VANXX_AGTTCC_136693_S11_L004/f3656818-1adf-4262-81b0-dd00254a1c73/Salmon_out/quant.sf	CP-2349	KM414-9263-3-5mm-nt	KM414-9263-3-5mm-nt	CP-2349|KM414-9263-3-5mm-nt|180427_UNC17-D00216_0528_BCCH2PANXX_ATCACG_S9_L005	Balb/c p53-/-	9263	Y	GSE124821-GPL17021
/datastore/nextgenout4/share/labs/bioinformatics/cmp_seq/mouse/rnaseq-output/150501_UNC11-SN627_0398_AC5KENACXX_CCGTCC_L001/28385c28-e917-45c9-a175-bc977ec9f27d/Salmon_out/quant.sf	/datastore/nextgenout4/share/labs/bioinformatics/cmp_seq/mouse/rnaseq-output/150501_UNC11-SN627_0398_AC5KENACXX_CCGTCC_L001/28385c28-e917-45c9-a175-bc977ec9f27d/Salmon_out/quant.sf	CP-2352	KM420-9263-3-5mm-nt	KM420-9263-3-5mm-nt	CP-2352|KM420-9263-3-5mm-nt|180427_UNC17-D00216_0528_BCCH2PANXX_TGACCA_S12_L005	Balb/c p53-/-	9263	Y	GSE124821-GPL17021
/datastore/nextgenout4/share/labs/bioinformatics/cmp_seq/mouse/rnaseq-output/150501_UNC11-SN627_0398_AC5KENACXX_CAGATC_L003/d4977b95-fb8b-44f9-bba3-ad59330e82f3/Salmon_out/quant.sf	/datastore/nextgenout4/share/labs/bioinformatics/cmp_seq/mouse/rnaseq-output/150501_UNC11-SN627_0398_AC5KENACXX_CAGATC_L003/d4977b95-fb8b-44f9-bba3-ad59330e82f3/Salmon_out/quant.sf	CP-2351	KM421-9263-3-5mm-nt	KM421-9263-3-5mm-nt	CP-2351|KM421-9263-3-5mm-nt|180427_UNC17-D00216_0528_BCCH2PANXX_TTAGGC_S10_L005	Balb/c p53-/-	9263	Y	GSE124821-GPL17021
/datastore/nextgenout4/share/labs/bioinformatics/cmp_seq/mouse/rnaseq-output/C9T7VANXX_CGTACG_136702_S6_L002/195e61be-820d-4636-a12b-c2cad69ce155/Salmon_out/quant.sf	/datastore/nextgenout4/share/labs/bioinformatics/cmp_seq/mouse/rnaseq-output/C9T7VANXX_CGTACG_136702_S6_L002/195e61be-820d-4636-a12b-c2cad69ce155/Salmon_out/quant.sf	CP-2350	KM427-9263-3-5mm-nt	KM427-9263-3-5mm-nt	CP-2350|KM427-9263-3-5mm-nt|180427_UNC17-D00216_0528_BCCH2PANXX_CGATGT_S11_L005	Balb/c p53-/-	9263	Y	GSE124821-GPL17021
/datastore/nextgenout4/share/labs/bioinformatics/cmp_seq/mouse/rnaseq-output/CP-1915-B4513-5R-ILC-ST_CTTGTA_L003/856e72ac-037e-4aaa-80d2-9e35c7b9e07f/Salmon_out/quant.sf	/datastore/nextgenout4/share/labs/bioinformatics/cmp_seq/mouse/rnaseq-output/CP-1915-B4513-5R-ILC-ST_CTTGTA_L003/856e72ac-037e-4aaa-80d2-9e35c7b9e07f/Salmon_out/quant.sf	ROSEN-9	2151R	2151R	ROSEN-9|2151R|150501_UNC11-SN627_0398_AC5KENACXX_CTTGTA_L002	Balb/c p53-/-	2151R	Y	GSE124821-GPL13112
/datastore/nextgenout4/share/labs/bioinformatics/cmp_seq/mouse/rnaseq-output/CP-1908-B4532-4R-ILC-ST_ACAGTG_L005/20a151e0-0d2c-45e7-83db-a7fcf081eeab/Salmon_out/quant.sf	/datastore/nextgenout4/share/labs/bioinformatics/cmp_seq/mouse/rnaseq-output/CP-1908-B4532-4R-ILC-ST_ACAGTG_L005/20a151e0-0d2c-45e7-83db-a7fcf081eeab/Salmon_out/quant.sf	CP-2254	KM277-2153F-5mm	KM277-2153F-5mm	CP-2254|KM277-2153F-5mm|180110_UNC18-D00493_0484_BCC2J8ANXX_ATCACG_S17_L005	Balb/c p53-/-	2153F	Y	GSE124821-GPL17021
/datastore/nextgenout4/share/labs/bioinformatics/cmp_seq/mouse/rnaseq-output/CP-1912-B4535-1R-ILC-ST_GATCAG_L004/3d2d0969-3268-453d-bd65-945958d154af/Salmon_out/quant.sf	/datastore/nextgenout4/share/labs/bioinformatics/cmp_seq/mouse/rnaseq-output/CP-1912-B4535-1R-ILC-ST_GATCAG_L004/3d2d0969-3268-453d-bd65-945958d154af/Salmon_out/quant.sf	CP-2255	KM278-2153F-5mm	KM278-2153F-5mm	CP-2255|KM278-2153F-5mm|180110_UNC18-D00493_0484_BCC2J8ANXX_CGATGT_S18_L005	Balb/c p53-/-	2153F	Y	GSE124821-GPL17021
/datastore/nextgenout4/share/labs/bioinformatics/cmp_seq/mouse/rnaseq-output/CP-1909-B4538-3L-ILC-ST_GCCAAT_L005/06a60fb0-616d-411c-b38e-c683c83b4a60/Salmon_out/quant.sf	/datastore/nextgenout4/share/labs/bioinformatics/cmp_seq/mouse/rnaseq-output/CP-1909-B4538-3L-ILC-ST_GCCAAT_L005/06a60fb0-616d-411c-b38e-c683c83b4a60/Salmon_out/quant.sf	CP-2256	KM279-2153F-5mm	KM279-2153F-5mm	CP-2256|KM279-2153F-5mm|180110_UNC18-D00493_0484_BCC2J8ANXX_TTAGGC_S19_L005	Balb/c p53-/-	2153F	Y	GSE124821-GPL17021
/datastore/nextgenout4/share/labs/bioinformatics/cmp_seq/mouse/rnaseq-output/CP-1910-B4540-5L-ILC-ST_CAGATC_L004/43266dc0-63d7-43f7-93ec-96578bc2c12b/Salmon_out/quant.sf	/datastore/nextgenout4/share/labs/bioinformatics/cmp_seq/mouse/rnaseq-output/CP-1910-B4540-5L-ILC-ST_CAGATC_L004/43266dc0-63d7-43f7-93ec-96578bc2c12b/Salmon_out/quant.sf	CP-1675	2224-MP1U-7	2224-MP1U-7	CP-1675|2224-MP1U-7|C9T7VANXX_CCGTCC_136696_S7_L003	Balb/c p53-/-	2224L	Y	GSE124821-GPL17021
/datastore/nextgenout4/share/labs/bioinformatics/cmp_seq/mouse/rnaseq-output/CP-1911-B4589-3L-ILC-ST_ACTTGA_L004/502b08fe-695e-49fd-8037-eb3ad45065be/Salmon_out/quant.sf	/datastore/nextgenout4/share/labs/bioinformatics/cmp_seq/mouse/rnaseq-output/CP-1911-B4589-3L-ILC-ST_ACTTGA_L004/502b08fe-695e-49fd-8037-eb3ad45065be/Salmon_out/quant.sf	CP-2168	BalbCp53null-2224L	BalbCp53null-2224L	CP-2168|BalbCp53null-2224L|170728_UNC17-D00216_0461_ACBCGAANXX_GTCCGC_S18_L004	Balb/c p53-/-	2224L	Y	GSE124821-GPL17021
/datastore/nextgenout4/share/labs/bioinformatics/cmp_seq/mouse/rnaseq-output/CP-1913-B4657-5L-ILC-ST_TAGCTT_L003/17814902-062a-4cdf-b0a1-f4db0e92a883/Salmon_out/quant.sf	/datastore/nextgenout4/share/labs/bioinformatics/cmp_seq/mouse/rnaseq-output/CP-1913-B4657-5L-ILC-ST_TAGCTT_L003/17814902-062a-4cdf-b0a1-f4db0e92a883/Salmon_out/quant.sf	CP-2270	KM272-2224L-5mm	KM272-2224L-5mm	CP-2270|KM272-2224L-5mm|180110_UNC18-D00493_0484_BCC2J8ANXX_GTCCGC_S1_L001	Balb/c p53-/-	2224L	Y	GSE124821-GPL17021
/datastore/nextgenout4/share/labs/bioinformatics/cmp_seq/mouse/rnaseq-output/CP-1914-B4713-5L-ILC-ST_GGCTAC_L003/a7733211-0c79-49ae-8a6e-1f1ea3d0651c/Salmon_out/quant.sf	/datastore/nextgenout4/share/labs/bioinformatics/cmp_seq/mouse/rnaseq-output/CP-1914-B4713-5L-ILC-ST_GGCTAC_L003/a7733211-0c79-49ae-8a6e-1f1ea3d0651c/Salmon_out/quant.sf	CP-2271	KM273-2224L-5mm	KM273-2224L-5mm	CP-2271|KM273-2224L-5mm|180110_UNC18-D00493_0484_BCC2J8ANXX_GTGAAA_S2_L001	Balb/c p53-/-	2224L	Y	GSE124821-GPL17021
/datastore/nextgenout4/share/labs/bioinformatics/cmp_seq/mouse/rnaseq-output/CP-1916-B4894-5L-ILC-ST_AGTCAA_L002/23113e22-95b6-4a9d-8a77-5888913a035b/Salmon_out/quant.sf	/datastore/nextgenout4/share/labs/bioinformatics/cmp_seq/mouse/rnaseq-output/CP-1916-B4894-5L-ILC-ST_AGTCAA_L002/23113e22-95b6-4a9d-8a77-5888913a035b/Salmon_out/quant.sf	CP-2273	KM274-2224L-5mm	KM274-2224L-5mm	CP-2273|KM274-2224L-5mm|180110_UNC18-D00493_0484_BCC2J8ANXX_GTTTCG_S4_L001	Balb/c p53-/-	2224L	Y	GSE124821-GPL17021
/datastore/nextgenout4/share/labs/bioinformatics/cmp_seq/mouse/rnaseq-output/CP-1917-B4894-5R-ILC-ST_AGTTCC_L002/d92a6bf3-e7d1-4065-9fbe-98aa842b461c/Salmon_out/quant.sf	/datastore/nextgenout4/share/labs/bioinformatics/cmp_seq/mouse/rnaseq-output/CP-1917-B4894-5R-ILC-ST_AGTTCC_L002/d92a6bf3-e7d1-4065-9fbe-98aa842b461c/Salmon_out/quant.sf	CP-2272	KM275-2224L-5mm	KM275-2224L-5mm	CP-2272|KM275-2224L-5mm|180110_UNC18-D00493_0484_BCC2J8ANXX_GTGGCC_S3_L001	Balb/c p53-/-	2224L	Y	GSE124821-GPL17021
/datastore/nextgenout4/share/labs/bioinformatics/cmp_seq/mouse/rnaseq-output/C9T7VANXX_GTGGCC_136700_S5_L002/8697429b-8382-49c5-b3f7-762db17bde50/Salmon_out/quant.sf	/datastore/nextgenout4/share/labs/bioinformatics/cmp_seq/mouse/rnaseq-output/C9T7VANXX_GTGGCC_136700_S5_L002/8697429b-8382-49c5-b3f7-762db17bde50/Salmon_out/quant.sf	CP-1673	2225L-DH481	2225L-DH481	CP-1673|2225L-DH481|C9T7VANXX_AGTTCC_136693_S11_L004	Balb/c p53-/-	2225L	Y	GSE124821-GPL17021
/datastore/nextgenout4/share/labs/bioinformatics/cmp_seq/mouse/rnaseq-output/C9T7VANXX_GTTTCG_136701_S4_L002/52943410-d571-44ca-883e-f822a23a4fd0/Salmon_out/quant.sf	/datastore/nextgenout4/share/labs/bioinformatics/cmp_seq/mouse/rnaseq-output/C9T7VANXX_GTTTCG_136701_S4_L002/52943410-d571-44ca-883e-f822a23a4fd0/Salmon_out/quant.sf	CP-2169	BalbCp53null-2225L	BalbCp53null-2225L	CP-2169|BalbCp53null-2225L|170728_UNC17-D00216_0461_ACBCGAANXX_GTGAAA_S17_L004	Balb/c p53-/-	2225L	Y	GSE124821-GPL17021
/datastore/nextgenout4/share/labs/bioinformatics/cmp_seq/mouse/rnaseq-output/CP-1946-BalbC3-pooledMAMM_ACTGAT_S6_L002/98ea2f0d-b753-481c-8a46-38e32ac6256a/Salmon_out/quant.sf	/datastore/nextgenout4/share/labs/bioinformatics/cmp_seq/mouse/rnaseq-output/CP-1946-BalbC3-pooledMAMM_ACTGAT_S6_L002/98ea2f0d-b753-481c-8a46-38e32ac6256a/Salmon_out/quant.sf	CP-2064	DH443_2225L_NotTreated	DH443_2225L_NotTreated	CP-2064|DH443_2225L_NotTreated|170505_UNC17-D00216_0441_BCAVF1ANXX_AGTCAA_S3_L001	Balb/c p53-/-	2225L	Y	GSE124821-GPL17021
/datastore/nextgenout4/share/labs/bioinformatics/cmp_seq/mouse/rnaseq-output/CP-1947-BalbC4-pooledMAMM_GGCTAC_S2_L001/1d55fa7f-d072-4c94-96dd-a37821f449c5/Salmon_out/quant.sf	/datastore/nextgenout4/share/labs/bioinformatics/cmp_seq/mouse/rnaseq-output/CP-1947-BalbC4-pooledMAMM_GGCTAC_S2_L001/1d55fa7f-d072-4c94-96dd-a37821f449c5/Salmon_out/quant.sf	CP-2052	DH447_2225L_3day_NT	DH447_2225L_3day_NT	CP-2052|DH447_2225L_3day_NT|170505_UNC17-D00216_0441_BCAVF1ANXX_ATCACG_S15_L004	Balb/c p53-/-	2225L	Y	GSE124821-GPL17021
/datastore/nextgenout4/share/labs/bioinformatics/cmp_seq/mouse/rnaseq-output/170728_UNC17-D00216_0461_ACBCGAANXX_GTCCGC_S18_L004/0b6b79e6-722c-4d56-8449-4f108764a6d9/Salmon_out/quant.sf	/datastore/nextgenout4/share/labs/bioinformatics/cmp_seq/mouse/rnaseq-output/170728_UNC17-D00216_0461_ACBCGAANXX_GTCCGC_S18_L004/0b6b79e6-722c-4d56-8449-4f108764a6d9/Salmon_out/quant.sf	CP-2065	DH448_2225L_NotTreated	DH448_2225L_NotTreated	CP-2065|DH448_2225L_NotTreated|170505_UNC17-D00216_0441_BCAVF1ANXX_AGTTCC_S2_L001	Balb/c p53-/-	2225L	Y	GSE124821-GPL17021
/datastore/nextgenout4/share/labs/bioinformatics/cmp_seq/mouse/rnaseq-output/170728_UNC17-D00216_0461_ACBCGAANXX_GTGAAA_S17_L004/edbe72d6-b275-4e6e-994d-f0533cb5ee55/Salmon_out/quant.sf	/datastore/nextgenout4/share/labs/bioinformatics/cmp_seq/mouse/rnaseq-output/170728_UNC17-D00216_0461_ACBCGAANXX_GTGAAA_S17_L004/edbe72d6-b275-4e6e-994d-f0533cb5ee55/Salmon_out/quant.sf	CP-2051	DH482_2225L_3day_NT	DH482_2225L_3day_NT	CP-2051|DH482_2225L_3day_NT|170505_UNC17-D00216_0441_BCAVF1ANXX_ATTCCT_S20_L005	Balb/c p53-/-	2225L	Y	GSE124821-GPL17021
/datastore/nextgenout4/share/labs/bioinformatics/cmp_seq/mouse/rnaseq-output/170728_UNC17-D00216_0461_ACBCGAANXX_GTGGCC_S19_L004/7a11a2a4-ae5e-4b24-9e13-af89a9668e26/Salmon_out/quant.sf	/datastore/nextgenout4/share/labs/bioinformatics/cmp_seq/mouse/rnaseq-output/170728_UNC17-D00216_0461_ACBCGAANXX_GTGGCC_S19_L004/7a11a2a4-ae5e-4b24-9e13-af89a9668e26/Salmon_out/quant.sf	CP-2063	DH494_2225L_NotTreated	DH494_2225L_NotTreated	CP-2063|DH494_2225L_NotTreated|170505_UNC17-D00216_0441_BCAVF1ANXX_CTTGTA_S7_L002	Balb/c p53-/-	2225L	Y	GSE124821-GPL17021
/datastore/nextgenout4/share/labs/bioinformatics/cmp_seq/mouse/rnaseq-output/170313_UNC17-D00216_0431_BCAKCYANXX_GTGGCC_S5_L002/0cb3ec5d-0252-4bfa-ae5f-e8a5ddfe879f/Salmon_out/quant.sf	/datastore/nextgenout4/share/labs/bioinformatics/cmp_seq/mouse/rnaseq-output/170313_UNC17-D00216_0431_BCAKCYANXX_GTGGCC_S5_L002/0cb3ec5d-0252-4bfa-ae5f-e8a5ddfe879f/Salmon_out/quant.sf	CP-2143	DH862_2225L_3day_nt	DH862_2225L_3day_nt	CP-2143|DH862_2225L_3day_nt|170728_UNC17-D00216_0461_ACBCGAANXX_CTTGTA_S24_L005	Balb/c p53-/-	2225L	Y	GSE124821-GPL17021
/datastore/nextgenout4/share/labs/bioinformatics/cmp_seq/mouse/rnaseq-output/140512_UNC9-SN296_0418_AC3Y8NACXX_GTGAAA_L005/3ea96679-3c0e-4fa0-a06b-12338a2df5ef/Salmon_out/quant.sf	/datastore/nextgenout4/share/labs/bioinformatics/cmp_seq/mouse/rnaseq-output/140512_UNC9-SN296_0418_AC3Y8NACXX_GTGAAA_L005/3ea96679-3c0e-4fa0-a06b-12338a2df5ef/Salmon_out/quant.sf	CP-2142	DH871_2225L_3day_nt	DH871_2225L_3day_nt	CP-2142|DH871_2225L_3day_nt|170728_UNC17-D00216_0461_ACBCGAANXX_GGCTAC_S23_L005	Balb/c p53-/-	2225L	Y	GSE124821-GPL17021
/datastore/nextgenout4/share/labs/bioinformatics/cmp_seq/mouse/rnaseq-output/140512_UNC9-SN296_0418_AC3Y8NACXX_ACAGTG_L005/9b97ebd3-71c2-48ac-b3b1-e1014504a890/Salmon_out/quant.sf	/datastore/nextgenout4/share/labs/bioinformatics/cmp_seq/mouse/rnaseq-output/140512_UNC9-SN296_0418_AC3Y8NACXX_ACAGTG_L005/9b97ebd3-71c2-48ac-b3b1-e1014504a890/Salmon_out/quant.sf	ROSEN-13	2245R	2245R	ROSEN-13|2245R|150501_UNC11-SN627_0398_AC5KENACXX_CCGTCC_L001	Balb/c p53-/-	2245R	Y	GSE124821-GPL13112
/datastore/nextgenout4/share/labs/bioinformatics/cmp_seq/mouse/rnaseq-output/140512_UNC9-SN296_0418_AC3Y8NACXX_GCCAAT_L006/ec05fbd7-5dee-41ce-bc46-bac329d9a9a7/Salmon_out/quant.sf	/datastore/nextgenout4/share/labs/bioinformatics/cmp_seq/mouse/rnaseq-output/140512_UNC9-SN296_0418_AC3Y8NACXX_GCCAAT_L006/ec05fbd7-5dee-41ce-bc46-bac329d9a9a7/Salmon_out/quant.sf	ROSEN-4	2336R	2336R	ROSEN-4|2336R|150501_UNC11-SN627_0398_AC5KENACXX_CAGATC_L003	Balb/c p53-/-	2336R	Y	GSE124821-GPL13112
/datastore/nextgenout4/share/labs/bioinformatics/cmp_seq/mouse/rnaseq-output/140512_UNC9-SN296_0418_AC3Y8NACXX_CTTGTA_L006/da7b865f-dcf6-4029-a2d2-908c5609bd7a/Salmon_out/quant.sf	/datastore/nextgenout4/share/labs/bioinformatics/cmp_seq/mouse/rnaseq-output/140512_UNC9-SN296_0418_AC3Y8NACXX_CTTGTA_L006/da7b865f-dcf6-4029-a2d2-908c5609bd7a/Salmon_out/quant.sf	CP-1680	2336R-PBS-p53null-MP1U38	2336R-PBS-p53null-MP1U38	CP-1680|2336R-PBS-p53null-MP1U38|C9T7VANXX_CGTACG_136702_S6_L002	Balb/c p53-/-	2336R	Y	GSE124821-GPL17021
/datastore/nextgenout4/share/labs/bioinformatics/cmp_seq/mouse/rnaseq-output/140512_UNC9-SN296_0418_AC3Y8NACXX_ATGTCA_L007/425d27e3-a00e-444e-9a8a-f87268569bb4/Salmon_out/quant.sf	/datastore/nextgenout4/share/labs/bioinformatics/cmp_seq/mouse/rnaseq-output/140512_UNC9-SN296_0418_AC3Y8NACXX_ATGTCA_L007/425d27e3-a00e-444e-9a8a-f87268569bb4/Salmon_out/quant.sf	CP-2170	BalbCp53null-2336R	BalbCp53null-2336R	CP-2170|BalbCp53null-2336R|170728_UNC17-D00216_0461_ACBCGAANXX_GTGGCC_S19_L004	Balb/c p53-/-	2336R	Y	GSE124821-GPL17021
/datastore/nextgenout4/share/labs/bioinformatics/cmp_seq/mouse/rnaseq-output/140512_UNC9-SN296_0418_AC3Y8NACXX_CCGTCC_L008/8d865d4f-d82c-49f0-90c1-c01572b333b2/Salmon_out/quant.sf	/datastore/nextgenout4/share/labs/bioinformatics/cmp_seq/mouse/rnaseq-output/140512_UNC9-SN296_0418_AC3Y8NACXX_CCGTCC_L008/8d865d4f-d82c-49f0-90c1-c01572b333b2/Salmon_out/quant.sf	CP-2129	DH850_2336R_3dayNotTreated	DH850_2336R_3dayNotTreated	CP-2129|DH850_2336R_3dayNotTreated|170706_UNC18-D00493_0430_ACBBR1ANXX_GAGTGG_S11_L003	Balb/c p53-/-	2336R	Y	GSE124821-GPL17021
/datastore/nextgenout4/share/labs/bioinformatics/cmp_seq/mouse/rnaseq-output/140512_UNC9-SN296_0418_AC3Y8NACXX_GTGAAA_L007/db75c9a3-8e46-47fc-809d-d0c0f0583cef/Salmon_out/quant.sf	/datastore/nextgenout4/share/labs/bioinformatics/cmp_seq/mouse/rnaseq-output/140512_UNC9-SN296_0418_AC3Y8NACXX_GTGAAA_L007/db75c9a3-8e46-47fc-809d-d0c0f0583cef/Salmon_out/quant.sf	CP-2118	DH851_2336R_NotTreated	DH851_2336R_NotTreated	CP-2118|DH851_2336R_NotTreated|170706_UNC18-D00493_0430_ACBBR1ANXX_GGCTAC_S21_L006	Balb/c p53-/-	2336R	Y	GSE124821-GPL17021
/datastore/nextgenout4/share/labs/bioinformatics/cmp_seq/mouse/rnaseq-output/130926_UNC15-SN850_0329_BC2JK7ACXX_ATGTCA_L004/4d0a82ca-ff11-43c3-8fcf-4bd54b0acf31/Salmon_out/quant.sf	/datastore/nextgenout4/share/labs/bioinformatics/cmp_seq/mouse/rnaseq-output/130926_UNC15-SN850_0329_BC2JK7ACXX_ATGTCA_L004/4d0a82ca-ff11-43c3-8fcf-4bd54b0acf31/Salmon_out/quant.sf	CP-2120	DH852_2336R_3day_notTreated	DH852_2336R_3day_notTreated	CP-2120|DH852_2336R_3day_notTreated|170706_UNC18-D00493_0430_ACBBR1ANXX_AGTCAA_S19_L005	Balb/c p53-/-	2336R	Y	GSE124821-GPL17021
/datastore/nextgenout4/share/labs/bioinformatics/cmp_seq/mouse/rnaseq-output/130924_UNC13-SN749_0305_AC2CK1ACXX_CCGTCC_L003/b81fea39-3dac-4921-b90b-25040570e80a/Salmon_out/quant.sf	/datastore/nextgenout4/share/labs/bioinformatics/cmp_seq/mouse/rnaseq-output/130924_UNC13-SN749_0305_AC2CK1ACXX_CCGTCC_L003/b81fea39-3dac-4921-b90b-25040570e80a/Salmon_out/quant.sf	CP-2109	DH861_2336R_3day_nottreated	DH861_2336R_3day_nottreated	CP-2109|DH861_2336R_3day_nottreated|170706_UNC18-D00493_0430_ACBBR1ANXX_CGATGT_S6_L008	Balb/c p53-/-	2336R	Y	GSE124821-GPL17021
/datastore/nextgenout4/share/labs/bioinformatics/cmp_seq/mouse/rnaseq-output/130926_UNC15-SN850_0329_BC2JK7ACXX_GTCCGC_L003/72bc0c92-0104-4d7b-8b6a-1f5d6060267c/Salmon_out/quant.sf	/datastore/nextgenout4/share/labs/bioinformatics/cmp_seq/mouse/rnaseq-output/130926_UNC15-SN850_0329_BC2JK7ACXX_GTCCGC_L003/72bc0c92-0104-4d7b-8b6a-1f5d6060267c/Salmon_out/quant.sf	CP-2050	MP1U1_2336R_pbs	MP1U1_2336R_pbs	CP-2050|MP1U1_2336R_pbs|170505_UNC17-D00216_0441_BCAVF1ANXX_ACTGAT_S17_L005	Balb/c p53-/-	2336R	Y	GSE124821-GPL17021
/datastore/nextgenout4/share/labs/bioinformatics/cmp_seq/mouse/rnaseq-output/130926_UNC15-SN850_0329_BC2JK7ACXX_GTGAAA_L001/eb07a80f-c8df-481d-b907-cbcbdc08e5e9/Salmon_out/quant.sf	/datastore/nextgenout4/share/labs/bioinformatics/cmp_seq/mouse/rnaseq-output/130926_UNC15-SN850_0329_BC2JK7ACXX_GTGAAA_L001/eb07a80f-c8df-481d-b907-cbcbdc08e5e9/Salmon_out/quant.sf	CP-2047	MP1U37_2336R_pbs	MP1U37_2336R_pbs	CP-2047|MP1U37_2336R_pbs|170505_UNC17-D00216_0441_BCAVF1ANXX_GTTTCG_S23_L006	Balb/c p53-/-	2336R	Y	GSE124821-GPL17021
/datastore/nextgenout5/share/labs/bioinformatics/cmp_seq/mouse/rnaseq-output/181003_UNC18-D00493_0566_ACCT24ANXX_CGATGT_S23_L007/45c0522c-ec91-435a-a4d8-4f811ae98f08/Salmon_out/quant.sf	/datastore/nextgenout5/share/labs/bioinformatics/cmp_seq/mouse/rnaseq-output/181003_UNC18-D00493_0566_ACCT24ANXX_CGATGT_S23_L007/45c0522c-ec91-435a-a4d8-4f811ae98f08/Salmon_out/quant.sf	CP-2049	MP1U38_2336R_pbs	MP1U38_2336R_pbs	CP-2049|MP1U38_2336R_pbs|170505_UNC17-D00216_0441_BCAVF1ANXX_GAGTGG_S18_L005	Balb/c p53-/-	2336R	Y	GSE124821-GPL17021
/datastore/nextgenout4/share/labs/bioinformatics/cmp_seq/mouse/rnaseq-output/180503_UNC17-D00216_0529_ACCG06ANXX_CCGTCC_S20_L005/8461e670-8524-499e-8a87-20d5b0bec498/Salmon_out/quant.sf	/datastore/nextgenout5/share/labs/bioinformatics/seqware/cmp_seq_temp_folder/mouse/rnaseq-output/180503_UNC17-D00216_0529_ACCG06ANXX_CCGTCC_S20_L005/8461e670-8524-499e-8a87-20d5b0bec498/Salmon_out/quant.sf	CP-2048	MP1U5_2336R_pbs	MP1U5_2336R_pbs	CP-2048|MP1U5_2336R_pbs|170505_UNC17-D00216_0441_BCAVF1ANXX_CGTACG_S19_L005	Balb/c p53-/-	2336R	Y	GSE124821-GPL17021
/datastore/nextgenout4/share/labs/bioinformatics/cmp_seq/mouse/rnaseq-output/180503_UNC17-D00216_0529_ACCG06ANXX_AGTCAA_S19_L005/86fc26c5-80ae-4d25-9000-011d8601e8d7/Salmon_out/quant.sf	/datastore/nextgenout5/share/labs/bioinformatics/seqware/cmp_seq_temp_folder/mouse/rnaseq-output/180503_UNC17-D00216_0529_ACCG06ANXX_AGTCAA_S19_L005/86fc26c5-80ae-4d25-9000-011d8601e8d7/Salmon_out/quant.sf	ROSEN-6	T1	T1	ROSEN-6|T1|150430_UNC12-SN629_0407_AC5HJ7ACXX_GATCAG_L007	Balb/c p53-/-	T1	Y	GSE124821-GPL13112
/datastore/nextgenout4/share/labs/bioinformatics/cmp_seq/mouse/rnaseq-output/180503_UNC17-D00216_0529_ACCG06ANXX_AGTTCC_S18_L005/eaba35e8-4a5f-413a-b5b5-8467dd760742/Salmon_out/quant.sf	/datastore/nextgenout5/share/labs/bioinformatics/seqware/cmp_seq_temp_folder/mouse/rnaseq-output/180503_UNC17-D00216_0529_ACCG06ANXX_AGTTCC_S18_L005/eaba35e8-4a5f-413a-b5b5-8467dd760742/Salmon_out/quant.sf	CP-2401	DH1472-T11-7Day-NT	DH1472-T11-7Day-NT	CP-2401|DH1472-T11-7Day-NT|180503_UNC17-D00216_0529_ACCG06ANXX_ATCACG_S5_L008	Balb/c p53-/-	T11	Y	GSE124821-GPL17021
/datastore/nextgenout4/share/labs/bioinformatics/cmp_seq/mouse/rnaseq-output/180503_UNC17-D00216_0529_ACCG06ANXX_ATGTCA_S17_L005/47be1a78-5425-4072-9814-e5dad053daf8/Salmon_out/quant.sf	/datastore/nextgenout5/share/labs/bioinformatics/seqware/cmp_seq_temp_folder/mouse/rnaseq-output/180503_UNC17-D00216_0529_ACCG06ANXX_ATGTCA_S17_L005/47be1a78-5425-4072-9814-e5dad053daf8/Salmon_out/quant.sf	CP-2402	DH1473-T11-7Day-NT	DH1473-T11-7Day-NT	CP-2402|DH1473-T11-7Day-NT|180503_UNC17-D00216_0529_ACCG06ANXX_CGATGT_S6_L008	Balb/c p53-/-	T11	Y	GSE124821-GPL17021
/datastore/nextgenout4/share/labs/bioinformatics/cmp_seq/mouse/rnaseq-output/180503_UNC17-D00216_0529_ACCG06ANXX_ATCACG_S5_L008/f0c5dcb6-cc5a-460a-9ea9-9afa2a870c05/Salmon_out/quant.sf	/datastore/nextgenout5/share/labs/bioinformatics/seqware/cmp_seq_temp_folder/mouse/rnaseq-output/180503_UNC17-D00216_0529_ACCG06ANXX_ATCACG_S5_L008/f0c5dcb6-cc5a-460a-9ea9-9afa2a870c05/Salmon_out/quant.sf	CP-2403	DH1474-T11-7Day-NT	DH1474-T11-7Day-NT	CP-2403|DH1474-T11-7Day-NT|180503_UNC17-D00216_0529_ACCG06ANXX_TTAGGC_S8_L008	Balb/c p53-/-	T11	Y	GSE124821-GPL17021
/datastore/nextgenout4/share/labs/bioinformatics/cmp_seq/mouse/rnaseq-output/180503_UNC17-D00216_0529_ACCG06ANXX_CGATGT_S6_L008/cc48b260-9da3-4ee6-81b3-b11ccd2d3641/Salmon_out/quant.sf	/datastore/nextgenout5/share/labs/bioinformatics/seqware/cmp_seq_temp_folder/mouse/rnaseq-output/180503_UNC17-D00216_0529_ACCG06ANXX_CGATGT_S6_L008/cc48b260-9da3-4ee6-81b3-b11ccd2d3641/Salmon_out/quant.sf	CP-2404	DH1475-T11-7Day-NT	DH1475-T11-7Day-NT	CP-2404|DH1475-T11-7Day-NT|180503_UNC17-D00216_0529_ACCG06ANXX_TGACCA_S7_L008	Balb/c p53-/-	T11	Y	GSE124821-GPL17021
/datastore/nextgenout4/share/labs/bioinformatics/cmp_seq/mouse/rnaseq-output/180503_UNC17-D00216_0529_ACCG06ANXX_TTAGGC_S8_L008/33ccabd9-a679-4bb7-90d1-5f739ee7c1b2/Salmon_out/quant.sf	/datastore/nextgenout5/share/labs/bioinformatics/seqware/cmp_seq_temp_folder/mouse/rnaseq-output/180503_UNC17-D00216_0529_ACCG06ANXX_TTAGGC_S8_L008/33ccabd9-a679-4bb7-90d1-5f739ee7c1b2/Salmon_out/quant.sf	CP-2356	DH925-T11-NT-End	DH925-T11-NT-End	CP-2356|DH925-T11-NT-End|180427_UNC17-D00216_0527_ACCG6GANXX_ACTTGA_S7_L008	Balb/c p53-/-	T11	Y	GSE124821-GPL17021
/datastore/nextgenout4/share/labs/bioinformatics/cmp_seq/mouse/rnaseq-output/180503_UNC17-D00216_0529_ACCG06ANXX_TGACCA_S7_L008/57114614-08cd-41aa-b4bf-070341e31e52/Salmon_out/quant.sf	/datastore/nextgenout5/share/labs/bioinformatics/seqware/cmp_seq_temp_folder/mouse/rnaseq-output/180503_UNC17-D00216_0529_ACCG06ANXX_TGACCA_S7_L008/57114614-08cd-41aa-b4bf-070341e31e52/Salmon_out/quant.sf	CP-2369	DH927-T11-NT-END	DH927-T11-NT-END	CP-2369|DH927-T11-NT-END|180427_UNC17-D00216_0527_ACCG6GANXX_CGTACG_S15_L004	Balb/c p53-/-	T11	Y	GSE124821-GPL17021
/datastore/nextgenout4/share/labs/bioinformatics/cmp_seq/mouse/rnaseq-output/170505_UNC17-D00216_0441_BCAVF1ANXX_AGTCAA_S3_L001/526ac04b-a74e-4c90-a989-b4f1d16a509f/Salmon_out/quant.sf	/datastore/nextgenout4/share/labs/bioinformatics/cmp_seq/mouse/rnaseq-output/170505_UNC17-D00216_0441_BCAVF1ANXX_AGTCAA_S3_L001/526ac04b-a74e-4c90-a989-b4f1d16a509f/Salmon_out/quant.sf	CP-2370	DH931-T11-NT-END	DH931-T11-NT-END	CP-2370|DH931-T11-NT-END|180427_UNC17-D00216_0527_ACCG6GANXX_GAGTGG_S14_L004	Balb/c p53-/-	T11	Y	GSE124821-GPL17021
/datastore/nextgenout4/share/labs/bioinformatics/cmp_seq/mouse/rnaseq-output/170505_UNC17-D00216_0441_BCAVF1ANXX_ATCACG_S15_L004/ae077716-91b5-4939-b757-28a8e7a33e50/Salmon_out/quant.sf	/datastore/nextgenout4/share/labs/bioinformatics/cmp_seq/mouse/rnaseq-output/170505_UNC17-D00216_0441_BCAVF1ANXX_ATCACG_S15_L004/ae077716-91b5-4939-b757-28a8e7a33e50/Salmon_out/quant.sf	CP-2258	DH932-T11-Reg-nt-3day	DH932-T11-Reg-nt-3day	CP-2258|DH932-T11-Reg-nt-3day|180110_UNC18-D00493_0484_BCC2J8ANXX_ACAGTG_S13_L004	Balb/c p53-/-	T11	Y	GSE124821-GPL17021
/datastore/nextgenout4/share/labs/bioinformatics/cmp_seq/mouse/rnaseq-output/170505_UNC17-D00216_0441_BCAVF1ANXX_AGTTCC_S2_L001/19b188cb-48b4-4405-8d6d-75a3b0730506/Salmon_out/quant.sf	/datastore/nextgenout4/share/labs/bioinformatics/cmp_seq/mouse/rnaseq-output/170505_UNC17-D00216_0441_BCAVF1ANXX_AGTTCC_S2_L001/19b188cb-48b4-4405-8d6d-75a3b0730506/Salmon_out/quant.sf	CP-2259	DH933-T11-Reg-nt-3day	DH933-T11-Reg-nt-3day	CP-2259|DH933-T11-Reg-nt-3day|180110_UNC18-D00493_0484_BCC2J8ANXX_GCCAAT_S16_L004	Balb/c p53-/-	T11	Y	GSE124821-GPL17021
/datastore/nextgenout4/share/labs/bioinformatics/cmp_seq/mouse/rnaseq-output/170505_UNC17-D00216_0441_BCAVF1ANXX_ATTCCT_S20_L005/36951145-8fb9-47a4-8d17-e9b0df76f5b6/Salmon_out/quant.sf	/datastore/nextgenout4/share/labs/bioinformatics/cmp_seq/mouse/rnaseq-output/170505_UNC17-D00216_0441_BCAVF1ANXX_ATTCCT_S20_L005/36951145-8fb9-47a4-8d17-e9b0df76f5b6/Salmon_out/quant.sf	CP-2260	DH934-T11-Reg-nt-3day	DH934-T11-Reg-nt-3day	CP-2260|DH934-T11-Reg-nt-3day|180110_UNC18-D00493_0484_BCC2J8ANXX_CAGATC_S15_L004	Balb/c p53-/-	T11	Y	GSE124821-GPL17021
/datastore/nextgenout4/share/labs/bioinformatics/cmp_seq/mouse/rnaseq-output/170505_UNC17-D00216_0441_BCAVF1ANXX_CTTGTA_S7_L002/d732ed32-4df6-4dab-998f-cb6b7f7eddde/Salmon_out/quant.sf	/datastore/nextgenout4/share/labs/bioinformatics/cmp_seq/mouse/rnaseq-output/170505_UNC17-D00216_0441_BCAVF1ANXX_CTTGTA_S7_L002/d732ed32-4df6-4dab-998f-cb6b7f7eddde/Salmon_out/quant.sf	CP-2261	DH935-T11-Reg-nt-3day	DH935-T11-Reg-nt-3day	CP-2261|DH935-T11-Reg-nt-3day|180110_UNC18-D00493_0484_BCC2J8ANXX_ACTTGA_S14_L004	Balb/c p53-/-	T11	Y	GSE124821-GPL17021
/datastore/nextgenout4/share/labs/bioinformatics/cmp_seq/mouse/rnaseq-output/170505_UNC17-D00216_0440_ACAL2BANXX_ACAGTG_S3_L007/ca2cb780-5161-4718-92ab-23d3c874385c/Salmon_out/quant.sf	/datastore/nextgenout4/share/labs/bioinformatics/cmp_seq/mouse/rnaseq-output/170505_UNC17-D00216_0440_ACAL2BANXX_ACAGTG_S3_L007/ca2cb780-5161-4718-92ab-23d3c874385c/Salmon_out/quant.sf	CP-2371	DH953-T11-NT-END	DH953-T11-NT-END	CP-2371|DH953-T11-NT-END|180427_UNC17-D00216_0527_ACCG6GANXX_ACTGAT_S13_L004	Balb/c p53-/-	T11	Y	GSE124821-GPL17021
/datastore/nextgenout4/share/labs/bioinformatics/cmp_seq/mouse/rnaseq-output/170505_UNC17-D00216_0440_ACAL2BANXX_TTAGGC_S8_L008/d88e522b-26f7-45b0-8656-670cc52974b8/Salmon_out/quant.sf	/datastore/nextgenout4/share/labs/bioinformatics/cmp_seq/mouse/rnaseq-output/170505_UNC17-D00216_0440_ACAL2BANXX_TTAGGC_S8_L008/d88e522b-26f7-45b0-8656-670cc52974b8/Salmon_out/quant.sf	CP-2372	DH959-T11-NT-END	DH959-T11-NT-END	CP-2372|DH959-T11-NT-END|180427_UNC17-D00216_0527_ACCG6GANXX_ATTCCT_S16_L004	Balb/c p53-/-	T11	Y	GSE124821-GPL17021
/datastore/nextgenout4/share/labs/bioinformatics/cmp_seq/mouse/rnaseq-output/170505_UNC17-D00216_0440_ACAL2BANXX_ATGTCA_S17_L005/fc8e4398-0172-4d18-82d1-fa528c156ee8/Salmon_out/quant.sf	/datastore/nextgenout4/share/labs/bioinformatics/cmp_seq/mouse/rnaseq-output/170505_UNC17-D00216_0440_ACAL2BANXX_ATGTCA_S17_L005/fc8e4398-0172-4d18-82d1-fa528c156ee8/Salmon_out/quant.sf	CP-2159	T11_V5_CELL_LINE	T11_V5_CELL_LINE	CP-2159|T11_V5_CELL_LINE|170714_UNC18-D00493_0431_ACB7RRANXX_ACAGTG_S24_L005	Balb/c p53-/-	T11_CL	Y	GSE124821-GPL17021
/datastore/nextgenout4/share/labs/bioinformatics/cmp_seq/mouse/rnaseq-output/170505_UNC17-D00216_0440_ACAL2BANXX_CGATGT_S6_L008/2b11ea65-a9db-4fd8-a707-a5772b93158d/Salmon_out/quant.sf	/datastore/nextgenout4/share/labs/bioinformatics/cmp_seq/mouse/rnaseq-output/170505_UNC17-D00216_0440_ACAL2BANXX_CGATGT_S6_L008/2b11ea65-a9db-4fd8-a707-a5772b93158d/Salmon_out/quant.sf	CP-2381	T-11-CellLine-VALIDATION	T-11-CellLine-VALIDATION	CP-2381|T-11-CellLine-VALIDATION|180427_UNC17-D00216_0527_ACCG6GANXX_GATCAG_S3_L001	Balb/c p53-/-	T11_CL_val	Y	GSE124821-GPL17021
/datastore/nextgenout4/share/labs/bioinformatics/cmp_seq/mouse/rnaseq-output/170505_UNC17-D00216_0440_ACAL2BANXX_ACTTGA_S4_L007/62a834da-e4f0-44c3-a486-f55d6ddc6dab/Salmon_out/quant.sf	/datastore/nextgenout4/share/labs/bioinformatics/cmp_seq/mouse/rnaseq-output/170505_UNC17-D00216_0440_ACAL2BANXX_ACTTGA_S4_L007/62a834da-e4f0-44c3-a486-f55d6ddc6dab/Salmon_out/quant.sf	ROSEN-11	T12	T12	ROSEN-11|T12|150501_UNC11-SN627_0398_AC5KENACXX_AGTTCC_L001	Balb/c p53-/-	T12	Y	GSE124821-GPL13112
/datastore/nextgenout4/share/labs/bioinformatics/cmp_seq/mouse/rnaseq-output/170505_UNC17-D00216_0440_ACAL2BANXX_ATCACG_S5_L008/e1630aff-e52e-4c4a-9421-c2734237a5ee/Salmon_out/quant.sf	/datastore/nextgenout4/share/labs/bioinformatics/cmp_seq/mouse/rnaseq-output/170505_UNC17-D00216_0440_ACAL2BANXX_ATCACG_S5_L008/e1630aff-e52e-4c4a-9421-c2734237a5ee/Salmon_out/quant.sf	CP-2348	TumorT12-VAL	TumorT12-VAL	CP-2348|TumorT12-VAL|180319_UNC17-D00216_0516_BCC8WFANXX_GTGGCC_S1_L001	Balb/c p53-/-	T12_val	Y	GSE124821-GPL17021
/datastore/nextgenout4/share/labs/bioinformatics/cmp_seq/mouse/rnaseq-output/170706_UNC18-D00493_0430_ACBBR1ANXX_GTGGCC_S13_L004/bc122451-8ba3-43fb-a7eb-ee4f85a6ba35/Salmon_out/quant.sf	/datastore/nextgenout4/share/labs/bioinformatics/cmp_seq/mouse/rnaseq-output/170706_UNC18-D00493_0430_ACBBR1ANXX_GTGGCC_S13_L004/bc122451-8ba3-43fb-a7eb-ee4f85a6ba35/Salmon_out/quant.sf	ROSEN-7	T2	T2	ROSEN-7|T2|150430_UNC12-SN629_0407_AC5HJ7ACXX_TAGCTT_L007	Balb/c p53-/-	T2	Y	GSE124821-GPL13112
/datastore/nextgenout4/share/labs/bioinformatics/cmp_seq/mouse/rnaseq-output/170706_UNC18-D00493_0430_ACBBR1ANXX_GAGTGG_S11_L003/211e5598-839f-4241-9133-cb05b4dfbe6b/Salmon_out/quant.sf	/datastore/nextgenout4/share/labs/bioinformatics/cmp_seq/mouse/rnaseq-output/170706_UNC18-D00493_0430_ACBBR1ANXX_GAGTGG_S11_L003/211e5598-839f-4241-9133-cb05b4dfbe6b/Salmon_out/quant.sf	ROSEN-8	T6	T6	ROSEN-8|T6|150430_UNC12-SN629_0407_AC5HJ7ACXX_GGCTAC_L008	Balb/c p53-/-	T6	Y	GSE124821-GPL13112
/datastore/nextgenout4/share/labs/bioinformatics/cmp_seq/mouse/rnaseq-output/170706_UNC18-D00493_0430_ACBBR1ANXX_GGCTAC_S21_L006/c8b6c9aa-a38d-4ea5-a8de-35c8f1c0f894/Salmon_out/quant.sf	/datastore/nextgenout4/share/labs/bioinformatics/cmp_seq/mouse/rnaseq-output/170706_UNC18-D00493_0430_ACBBR1ANXX_GGCTAC_S21_L006/c8b6c9aa-a38d-4ea5-a8de-35c8f1c0f894/Salmon_out/quant.sf	ROSEN-15	T7	T7	ROSEN-15|T7|150430_UNC12-SN629_0407_AC5HJ7ACXX_GTGAAA_L006	Balb/c p53-/-	T7	Y	GSE124821-GPL13112
/datastore/nextgenout4/share/labs/bioinformatics/cmp_seq/mouse/rnaseq-output/170706_UNC18-D00493_0430_ACBBR1ANXX_AGTCAA_S19_L005/276ec2b6-7b99-44e4-8ee5-28fae22497a1/Salmon_out/quant.sf	/datastore/nextgenout4/share/labs/bioinformatics/cmp_seq/mouse/rnaseq-output/170706_UNC18-D00493_0430_ACBBR1ANXX_AGTCAA_S19_L005/276ec2b6-7b99-44e4-8ee5-28fae22497a1/Salmon_out/quant.sf	CP-1946	BalbC3-pooledMAMM	BalbC3-pooledMAMM	CP-1946-BalbC3-pooledMAMM_ACTGAT_S6_L002	Balb/c wt	pooled	Y	GSE124821-GPL17021
/datastore/nextgenout4/share/labs/bioinformatics/cmp_seq/mouse/rnaseq-output/170706_UNC18-D00493_0430_ACBBR1ANXX_CGATGT_S6_L008/b8bf3516-09bc-4f5c-8ba8-36c924920a75/Salmon_out/quant.sf	/datastore/nextgenout4/share/labs/bioinformatics/cmp_seq/mouse/rnaseq-output/170706_UNC18-D00493_0430_ACBBR1ANXX_CGATGT_S6_L008/b8bf3516-09bc-4f5c-8ba8-36c924920a75/Salmon_out/quant.sf	CP-1947	BalbC4-pooledMAMM	BalbC4-pooledMAMM	CP-1947-BalbC4-pooledMAMM_GGCTAC_S2_L001	Balb/c wt	pooled	Y	GSE124821-GPL17021
/datastore/nextgenout4/share/labs/bioinformatics/cmp_seq/mouse/rnaseq-output/170728_UNC17-D00216_0461_ACBCGAANXX_CTTGTA_S24_L005/7c3cf834-1315-4692-a82d-dd72910c3c0c/Salmon_out/quant.sf	/datastore/nextgenout4/share/labs/bioinformatics/cmp_seq/mouse/rnaseq-output/170728_UNC17-D00216_0461_ACBCGAANXX_CTTGTA_S24_L005/7c3cf834-1315-4692-a82d-dd72910c3c0c/Salmon_out/quant.sf	CP-1678	BalbC Mammary 1	BalbC Mammary 1	CP-1678|BalbC Mammary 1|C9T7VANXX_GTGGCC_136700_S5_L002	Balb/c wt		Y	GSE124821-GPL17021
/datastore/nextgenout4/share/labs/bioinformatics/cmp_seq/mouse/rnaseq-output/170728_UNC17-D00216_0461_ACBCGAANXX_GGCTAC_S23_L005/168d015a-4b08-4c92-a304-8ffe9a0e9da3/Salmon_out/quant.sf	/datastore/nextgenout4/share/labs/bioinformatics/cmp_seq/mouse/rnaseq-output/170728_UNC17-D00216_0461_ACBCGAANXX_GGCTAC_S23_L005/168d015a-4b08-4c92-a304-8ffe9a0e9da3/Salmon_out/quant.sf	CP-1679	BalbC Mammary 2	BalbC Mammary 2	CP-1679|BalbC Mammary 2|C9T7VANXX_GTTTCG_136701_S4_L002	Balb/c wt		Y	GSE124821-GPL17021
/datastore/nextgenout4/share/labs/bioinformatics/cmp_seq/mouse/rnaseq-output/180427_UNC17-D00216_0527_ACCG6GANXX_GATCAG_S3_L007/e136e0a6-b8a0-49cc-b8bf-c692ac458cf6/Salmon_out/quant.sf	/datastore/nextgenout5/share/labs/bioinformatics/seqware/cmp_seq_temp_folder/mouse/rnaseq-output/180427_UNC17-D00216_0527_ACCG6GANXX_GATCAG_S3_L007/e136e0a6-b8a0-49cc-b8bf-c692ac458cf6/Salmon_out/quant.sf	CP-1331	JU-309N-Bc-mmg	JU-309N-Bc-mmg	CP-1331|JU-309N-Bc-mmg|151202_UNC18-D00493_0277_AC7MG2ANXX_TCCGGAG-GTACTGA_L004	Balb/c wt		Y	GSE124821-GPL17021
/datastore/nextgenout4/share/labs/bioinformatics/cmp_seq/mouse/rnaseq-output/180427_UNC17-D00216_0527_ACCG6GANXX_TAGCTT_S2_L007/fe2eae3c-39a5-453b-8e66-23a9da57f4ba/Salmon_out/quant.sf	/datastore/nextgenout5/share/labs/bioinformatics/seqware/cmp_seq_temp_folder/mouse/rnaseq-output/180427_UNC17-D00216_0527_ACCG6GANXX_TAGCTT_S2_L007/fe2eae3c-39a5-453b-8e66-23a9da57f4ba/Salmon_out/quant.sf	CP-896	C3TAG 135478	C3TAG 135478	CP-896|C3TAG 135478|140512_UNC9-SN296_0418_AC3Y8NACXX_GTGAAA_L005	C3 TAg	135478	Y	GSE124821-GPL13112
/datastore/nextgenout4/share/labs/bioinformatics/cmp_seq/mouse/rnaseq-output/180427_UNC17-D00216_0527_ACCG6GANXX_CTTGTA_S4_L007/b1dcbda1-7051-4bbb-85b0-08c51d41fede/Salmon_out/quant.sf	/datastore/nextgenout5/share/labs/bioinformatics/seqware/cmp_seq_temp_folder/mouse/rnaseq-output/180427_UNC17-D00216_0527_ACCG6GANXX_CTTGTA_S4_L007/b1dcbda1-7051-4bbb-85b0-08c51d41fede/Salmon_out/quant.sf	CP-897	C3TAG 136827	C3TAG 136827	CP-897|C3TAG 136827|140512_UNC9-SN296_0418_AC3Y8NACXX_ACAGTG_L005	C3 TAg	136827	Y	GSE124821-GPL13112
/datastore/nextgenout4/share/labs/bioinformatics/cmp_seq/mouse/rnaseq-output/180427_UNC17-D00216_0527_ACCG6GANXX_ACTTGA_S7_L008/7e9c2a6a-d78b-4536-881e-9e523f00f51a/Salmon_out/quant.sf	/datastore/nextgenout5/share/labs/bioinformatics/seqware/cmp_seq_temp_folder/mouse/rnaseq-output/180427_UNC17-D00216_0527_ACCG6GANXX_ACTTGA_S7_L008/7e9c2a6a-d78b-4536-881e-9e523f00f51a/Salmon_out/quant.sf	CP-898	C3TAG 148641	C3TAG 148641	CP-898|C3TAG 148641|140512_UNC9-SN296_0418_AC3Y8NACXX_GCCAAT_L006	C3 TAg	148641	Y	GSE124821-GPL13112
/datastore/nextgenout4/share/labs/bioinformatics/cmp_seq/mouse/rnaseq-output/180427_UNC17-D00216_0527_ACCG6GANXX_CGTACG_S15_L004/611b117c-f94b-4ae3-a43f-3b22cbd4c056/Salmon_out/quant.sf	/datastore/nextgenout5/share/labs/bioinformatics/seqware/cmp_seq_temp_folder/mouse/rnaseq-output/180427_UNC17-D00216_0527_ACCG6GANXX_CGTACG_S15_L004/611b117c-f94b-4ae3-a43f-3b22cbd4c056/Salmon_out/quant.sf	CP-899	C3TAG 150376	C3TAG 150376	CP-899|C3TAG 150376|140512_UNC9-SN296_0418_AC3Y8NACXX_CTTGTA_L006	C3 TAg	150376	Y	GSE124821-GPL13112
/datastore/nextgenout4/share/labs/bioinformatics/cmp_seq/mouse/rnaseq-output/180427_UNC17-D00216_0527_ACCG6GANXX_GAGTGG_S14_L004/f7747def-f262-4844-aa8d-77b74d0fd5c5/Salmon_out/quant.sf	/datastore/nextgenout5/share/labs/bioinformatics/seqware/cmp_seq_temp_folder/mouse/rnaseq-output/180427_UNC17-D00216_0527_ACCG6GANXX_GAGTGG_S14_L004/f7747def-f262-4844-aa8d-77b74d0fd5c5/Salmon_out/quant.sf	CP-701	C3TAG-158413	C3TAG-158413	CP-701|C3TAG-158413|130926_UNC15-SN850_0329_BC2JK7ACXX_ATGTCA_L004	C3 TAg	158413	Y	GSE124821-GPL13112
/datastore/nextgenout4/share/labs/bioinformatics/cmp_seq/mouse/rnaseq-output/180110_UNC18-D00493_0484_BCC2J8ANXX_ACAGTG_S13_L004/bbbb9055-9ac9-46e7-a5c8-fc77d3f69cd3/Salmon_out/quant.sf	/datastore/nextgenout5/share/labs/bioinformatics/seqware/mouse_test_run/rnaseq-output/180110_UNC18-D00493_0484_BCC2J8ANXX_ACAGTG_S13_L004/bbbb9055-9ac9-46e7-a5c8-fc77d3f69cd3/Salmon_out/quant.sf	CP-683	C3TAG-159447	C3TAG-159447	CP-683|C3TAG-159447|130924_UNC13-SN749_0305_AC2CK1ACXX_CCGTCC_L003	C3 TAg	159447	Y	GSE124821-GPL17021
/datastore/nextgenout4/share/labs/bioinformatics/cmp_seq/mouse/rnaseq-output/180110_UNC18-D00493_0484_BCC2J8ANXX_GCCAAT_S16_L004/8ac85c1d-54a2-4374-9250-15862d647691/Salmon_out/quant.sf	/datastore/nextgenout5/share/labs/bioinformatics/seqware/mouse_test_run/rnaseq-output/180110_UNC18-D00493_0484_BCC2J8ANXX_GCCAAT_S16_L004/8ac85c1d-54a2-4374-9250-15862d647691/Salmon_out/quant.sf	CP-699	C3TAG-159450	C3TAG-159450	CP-699|C3TAG-159450|130926_UNC15-SN850_0329_BC2JK7ACXX_GTCCGC_L003	C3 TAg	159450	Y	GSE124821-GPL13112
/datastore/nextgenout4/share/labs/bioinformatics/cmp_seq/mouse/rnaseq-output/180110_UNC18-D00493_0484_BCC2J8ANXX_CAGATC_S15_L004/14e6b7ae-3053-43a3-97c4-fcccb06102f8/Salmon_out/quant.sf	/datastore/nextgenout5/share/labs/bioinformatics/seqware/mouse_test_run/rnaseq-output/180110_UNC18-D00493_0484_BCC2J8ANXX_CAGATC_S15_L004/14e6b7ae-3053-43a3-97c4-fcccb06102f8/Salmon_out/quant.sf	CP-695	C3TAG-160056	C3TAG-160056	CP-695|C3TAG-160056|130926_UNC15-SN850_0329_BC2JK7ACXX_GTGAAA_L001	C3 TAg	160056	Y	GSE124821-GPL13112
/datastore/nextgenout4/share/labs/bioinformatics/cmp_seq/mouse/rnaseq-output/180110_UNC18-D00493_0484_BCC2J8ANXX_ACTTGA_S14_L004/b6d96e7b-ccd3-45e9-b277-f65f991390d5/Salmon_out/quant.sf	/datastore/nextgenout5/share/labs/bioinformatics/seqware/mouse_test_run/rnaseq-output/180110_UNC18-D00493_0484_BCC2J8ANXX_ACTTGA_S14_L004/b6d96e7b-ccd3-45e9-b277-f65f991390d5/Salmon_out/quant.sf	CP-901	C3TAG 165961	C3TAG 165961	CP-901|C3TAG 165961|140512_UNC9-SN296_0418_AC3Y8NACXX_ATGTCA_L007	C3 TAg	165961	Y	GSE124821-GPL13112
/datastore/nextgenout4/share/labs/bioinformatics/cmp_seq/mouse/rnaseq-output/180427_UNC17-D00216_0527_ACCG6GANXX_ACTGAT_S13_L004/6002d7fe-10da-446e-a315-e4d296b09477/Salmon_out/quant.sf	/datastore/nextgenout5/share/labs/bioinformatics/seqware/cmp_seq_temp_folder/mouse/rnaseq-output/180427_UNC17-D00216_0527_ACCG6GANXX_ACTGAT_S13_L004/6002d7fe-10da-446e-a315-e4d296b09477/Salmon_out/quant.sf	CP-902	C3TAG 165962	C3TAG 165962	CP-902|C3TAG 165962|140512_UNC9-SN296_0418_AC3Y8NACXX_CCGTCC_L008	C3 TAg	165962	Y	GSE124821-GPL13112
/datastore/nextgenout4/share/labs/bioinformatics/cmp_seq/mouse/rnaseq-output/180427_UNC17-D00216_0527_ACCG6GANXX_ATTCCT_S16_L004/5a93d8b7-73d8-448c-a8f7-b5c2350d6e64/Salmon_out/quant.sf	/datastore/nextgenout5/share/labs/bioinformatics/seqware/cmp_seq_temp_folder/mouse/rnaseq-output/180427_UNC17-D00216_0527_ACCG6GANXX_ATTCCT_S16_L004/5a93d8b7-73d8-448c-a8f7-b5c2350d6e64/Salmon_out/quant.sf	CP-900	C3TAG 166232	C3TAG 166232	CP-900|C3TAG 166232|140512_UNC9-SN296_0418_AC3Y8NACXX_GTGAAA_L007	C3 TAg	166232	Y	GSE124821-GPL13112
/datastore/nextgenout4/share/labs/bioinformatics/cmp_seq/mouse/rnaseq-output/C9T7VANXX_GTCCGC_136697_S8_L003/ffd8c46b-65a6-44ad-b523-55513ba7cea6/Salmon_out/quant.sf	/datastore/nextgenout4/share/labs/bioinformatics/cmp_seq/mouse/rnaseq-output/C9T7VANXX_GTCCGC_136697_S8_L003/ffd8c46b-65a6-44ad-b523-55513ba7cea6/Salmon_out/quant.sf	CP-1251	K14 149722_ Prim	K14 149722_ Prim	CP-1251|K14 149722_ Prim|150814_UNC18-D00493_0253_BC7HR1ANXX_CGATGT_L008	FVB K14-p53-BRCA1 mut	149722	Y	GSE124821-GPL17021
/datastore/nextgenout4/share/labs/bioinformatics/cmp_seq/mouse/rnaseq-output/C9T7VANXX_GTGAAA_136698_S9_L003/b1c01905-1665-458d-9da1-2c63cd72e0f7/Salmon_out/quant.sf	/datastore/nextgenout4/share/labs/bioinformatics/cmp_seq/mouse/rnaseq-output/C9T7VANXX_GTGAAA_136698_S9_L003/b1c01905-1665-458d-9da1-2c63cd72e0f7/Salmon_out/quant.sf	CP-1250	K14 150484_Prim	K14 150484_Prim	CP-1250|K14 150484_Prim|150814_UNC18-D00493_0253_BC7HR1ANXX_ATCACG_L008	FVB K14-p53-BRCA1 mut	150484	Y	GSE124821-GPL17021
/datastore/nextgenout4/share/labs/bioinformatics/cmp_seq/mouse/rnaseq-output/150501_UNC15-SN850_0405_BC5HCYACXX_CTTGTA_L008/16becdef-aec8-4261-9f85-b179b66c43a1/Salmon_out/quant.sf	/datastore/nextgenout4/share/labs/bioinformatics/cmp_seq/mouse/rnaseq-output/150501_UNC15-SN850_0405_BC5HCYACXX_CTTGTA_L008/16becdef-aec8-4261-9f85-b179b66c43a1/Salmon_out/quant.sf	CP-1270	K14_151241_Prim	K14_151241_Prim	CP-1270|K14_151241_Prim|150824_UNC18-D00493_0255_AC6P35ANXX_ACAGTG_L002	FVB K14-p53-BRCA1 mut	151241	Y	GSE124821-GPL17021
/datastore/nextgenout4/share/labs/bioinformatics/cmp_seq/mouse/rnaseq-output/150514_UNC11-SN627_0400_AC5J46ACXX_ACTGAT_L007/b522169f-f56a-4f85-bd8c-0559f3294e22/Salmon_out/quant.sf	/datastore/nextgenout4/share/labs/bioinformatics/cmp_seq/mouse/rnaseq-output/150514_UNC11-SN627_0400_AC5J46ACXX_ACTGAT_L007/b522169f-f56a-4f85-bd8c-0559f3294e22/Salmon_out/quant.sf	CP-1262	K14_151363_Prim	K14_151363_Prim	CP-1262|K14_151363_Prim|150819_UNC17-D00216_0337_AC7JCLANXX_AGTCAA_L006	FVB K14-p53-BRCA1 mut	151363	Y	GSE124821-GPL17021
/datastore/nextgenout4/share/labs/bioinformatics/cmp_seq/mouse/rnaseq-output/150430_UNC12-SN629_0408_BC5HJ9ACXX_ATTCCT_L004/2fe50179-90ae-460a-ad47-a58581ba8729/Salmon_out/quant.sf	/datastore/nextgenout4/share/labs/bioinformatics/cmp_seq/mouse/rnaseq-output/150430_UNC12-SN629_0408_BC5HJ9ACXX_ATTCCT_L004/2fe50179-90ae-460a-ad47-a58581ba8729/Salmon_out/quant.sf	CP-1265	K14_151591_Prim	K14_151591_Prim	CP-1265|K14_151591_Prim|150819_UNC17-D00216_0337_AC7JCLANXX_CCGTCC_L007	FVB K14-p53-BRCA1 mut	151591	Y	GSE124821-GPL17021
/datastore/nextgenout4/share/labs/bioinformatics/cmp_seq/mouse/rnaseq-output/150501_UNC15-SN850_0405_BC5HCYACXX_AGTCAA_L008/91f656a1-ed44-4e3e-ad9d-5ce19a885b63/Salmon_out/quant.sf	/datastore/nextgenout4/share/labs/bioinformatics/cmp_seq/mouse/rnaseq-output/150501_UNC15-SN850_0405_BC5HCYACXX_AGTCAA_L008/91f656a1-ed44-4e3e-ad9d-5ce19a885b63/Salmon_out/quant.sf	CP-1260	K14_151884_Prim	K14_151884_Prim	CP-1260|K14_151884_Prim|150819_UNC17-D00216_0337_AC7JCLANXX_GGCTAC_L005	FVB K14-p53-BRCA1 mut	151884	Y	GSE124821-GPL17021
/datastore/nextgenout4/share/labs/bioinformatics/cmp_seq/mouse/rnaseq-output/150501_UNC15-SN850_0405_BC5HCYACXX_GTTTCG_L005/809af35e-71b9-4dec-95fd-e25093905305/Salmon_out/quant.sf	/datastore/nextgenout4/share/labs/bioinformatics/cmp_seq/mouse/rnaseq-output/150501_UNC15-SN850_0405_BC5HCYACXX_GTTTCG_L005/809af35e-71b9-4dec-95fd-e25093905305/Salmon_out/quant.sf	CP-1261	K14_152422_Prim	K14_152422_Prim	CP-1261|K14_152422_Prim|150819_UNC17-D00216_0337_AC7JCLANXX_CTTGTA_L005	FVB K14-p53-BRCA1 mut	152422	Y	GSE124821-GPL17021
/datastore/nextgenout4/share/labs/bioinformatics/cmp_seq/mouse/rnaseq-output/150514_UNC11-SN627_0400_AC5J46ACXX_AGTTCC_L006/ef6539b3-a438-47a3-a35e-99101d5d8728/Salmon_out/quant.sf	/datastore/nextgenout4/share/labs/bioinformatics/cmp_seq/mouse/rnaseq-output/150514_UNC11-SN627_0400_AC5J46ACXX_AGTTCC_L006/ef6539b3-a438-47a3-a35e-99101d5d8728/Salmon_out/quant.sf	CP-1258	K14_152445_Prim	K14_152445_Prim	CP-1258|K14_152445_Prim|150819_UNC17-D00216_0337_AC7JCLANXX_GATCAG_L004	FVB K14-p53-BRCA1 mut	152445	Y	GSE124821-GPL17021
/datastore/nextgenout4/share/labs/bioinformatics/cmp_seq/mouse/rnaseq-output/150514_UNC11-SN627_0400_AC5J46ACXX_GAGTGG_L007/e542e390-39d5-40c7-bb02-fca160210cb7/Salmon_out/quant.sf	/datastore/nextgenout4/share/labs/bioinformatics/cmp_seq/mouse/rnaseq-output/150514_UNC11-SN627_0400_AC5J46ACXX_GAGTGG_L007/e542e390-39d5-40c7-bb02-fca160210cb7/Salmon_out/quant.sf	CP-1267	K14_152479_Prim	K14_152479_Prim	CP-1267|K14_152479_Prim|150819_UNC17-D00216_0337_AC7JCLANXX_CGATGT_L008	FVB K14-p53-BRCA1 mut	152479	Y	GSE124821-GPL17021
/datastore/nextgenout4/share/labs/bioinformatics/cmp_seq/mouse/rnaseq-output/150501_UNC15-SN850_0405_BC5HCYACXX_CGTACG_L007/5e132d83-562d-43a6-9876-694640c9347a/Salmon_out/quant.sf	/datastore/nextgenout4/share/labs/bioinformatics/cmp_seq/mouse/rnaseq-output/150501_UNC15-SN850_0405_BC5HCYACXX_CGTACG_L007/5e132d83-562d-43a6-9876-694640c9347a/Salmon_out/quant.sf	CP-1257	K14_152904_Prim	K14_152904_Prim	CP-1257|K14_152904_Prim|150819_UNC17-D00216_0337_AC7JCLANXX_ACTTGA_L003	FVB K14-p53-BRCA1 mut	152904	Y	GSE124821-GPL17021
/datastore/nextgenout4/share/labs/bioinformatics/cmp_seq/mouse/rnaseq-output/150514_UNC11-SN627_0400_AC5J46ACXX_CCGTCC_L005/7065918e-7154-4301-9d38-90bc91ee13cd/Salmon_out/quant.sf	/datastore/nextgenout4/share/labs/bioinformatics/cmp_seq/mouse/rnaseq-output/150514_UNC11-SN627_0400_AC5J46ACXX_CCGTCC_L005/7065918e-7154-4301-9d38-90bc91ee13cd/Salmon_out/quant.sf	CP-1269	K14_152940_Prim	K14_152940_Prim	CP-1269|K14_152940_Prim|150824_UNC18-D00493_0255_AC6P35ANXX_TGACCA_L001	FVB K14-p53-BRCA1 mut	152940	Y	GSE124821-GPL17021
/datastore/nextgenout4/share/labs/bioinformatics/cmp_seq/mouse/rnaseq-output/150514_UNC11-SN627_0400_AC5J46ACXX_GTCCGC_L005/e823175e-6cac-4d2b-989d-4aa4a8ce1f1a/Salmon_out/quant.sf	/datastore/nextgenout4/share/labs/bioinformatics/cmp_seq/mouse/rnaseq-output/150514_UNC11-SN627_0400_AC5J46ACXX_GTCCGC_L005/e823175e-6cac-4d2b-989d-4aa4a8ce1f1a/Salmon_out/quant.sf	CP-1264	K14_153084_Prim	K14_153084_Prim	CP-1264|K14_153084_Prim|150819_UNC17-D00216_0337_AC7JCLANXX_ATGTCA_L007	FVB K14-p53-BRCA1 mut	153084	Y	GSE124821-GPL17021
/datastore/nextgenout4/share/labs/bioinformatics/cmp_seq/mouse/rnaseq-output/150501_UNC15-SN850_0405_BC5HCYACXX_GTGAAA_L006/72feaf15-fdf7-4d2e-94eb-431250d4cfb9/Salmon_out/quant.sf	/datastore/nextgenout4/share/labs/bioinformatics/cmp_seq/mouse/rnaseq-output/150501_UNC15-SN850_0405_BC5HCYACXX_GTGAAA_L006/72feaf15-fdf7-4d2e-94eb-431250d4cfb9/Salmon_out/quant.sf	CP-1266	K14_153560_Prim	K14_153560_Prim	CP-1266|K14_153560_Prim|150819_UNC17-D00216_0337_AC7JCLANXX_ATCACG_L008	FVB K14-p53-BRCA1 mut	153560	Y	GSE124821-GPL17021
/datastore/nextgenout4/share/labs/bioinformatics/cmp_seq/mouse/rnaseq-output/150430_UNC12-SN629_0408_BC5HJ9ACXX_GTGGCC_L004/802bab64-dd06-4466-9d13-bc921b2e77cd/Salmon_out/quant.sf	/datastore/nextgenout4/share/labs/bioinformatics/cmp_seq/mouse/rnaseq-output/150430_UNC12-SN629_0408_BC5HJ9ACXX_GTGGCC_L004/802bab64-dd06-4466-9d13-bc921b2e77cd/Salmon_out/quant.sf	CP-1271	K14_153561_Prim	K14_153561_Prim	CP-1271|K14_153561_Prim|150824_UNC18-D00493_0255_AC6P35ANXX_GCCAAT_L002	FVB K14-p53-BRCA1 mut	153561	Y	GSE124821-GPL17021
/datastore/nextgenout4/share/labs/bioinformatics/cmp_seq/mouse/rnaseq-output/150514_UNC11-SN627_0400_AC5J46ACXX_ATGTCA_L005/daeccfb9-03b3-4c76-b1e4-a5eba6bee0b4/Salmon_out/quant.sf	/datastore/nextgenout4/share/labs/bioinformatics/cmp_seq/mouse/rnaseq-output/150514_UNC11-SN627_0400_AC5J46ACXX_ATGTCA_L005/daeccfb9-03b3-4c76-b1e4-a5eba6bee0b4/Salmon_out/quant.sf	CP-1256	K14_154140_Prim	K14_154140_Prim	CP-1256|K14_154140_Prim|150819_UNC17-D00216_0337_AC7JCLANXX_CAGATC_L003	FVB K14-p53-BRCA1 mut	154140	Y	GSE124821-GPL17021
/datastore/nextgenout4/share/labs/bioinformatics/cmp_seq/mouse/rnaseq-output/150501_UNC15-SN850_0405_BC5HCYACXX_GATCAG_L007/525f9699-7b42-4803-b232-452a9efdd453/Salmon_out/quant.sf	/datastore/nextgenout4/share/labs/bioinformatics/cmp_seq/mouse/rnaseq-output/150501_UNC15-SN850_0405_BC5HCYACXX_GATCAG_L007/525f9699-7b42-4803-b232-452a9efdd453/Salmon_out/quant.sf	CP-1255	K14_154160_Prim	K14_154160_Prim	CP-1255|K14_154160_Prim|150819_UNC17-D00216_0337_AC7JCLANXX_GCCAAT_L002	FVB K14-p53-BRCA1 mut	154160	Y	GSE124821-GPL17021
/datastore/nextgenout4/share/labs/bioinformatics/cmp_seq/mouse/rnaseq-output/150501_UNC15-SN850_0405_BC5HCYACXX_TAGCTT_L007/63746089-88d0-4d13-99d4-6023e1069a84/Salmon_out/quant.sf	/datastore/nextgenout4/share/labs/bioinformatics/cmp_seq/mouse/rnaseq-output/150501_UNC15-SN850_0405_BC5HCYACXX_TAGCTT_L007/63746089-88d0-4d13-99d4-6023e1069a84/Salmon_out/quant.sf	CP-1253	K14_154180_Prim	K14_154180_Prim	CP-1253|K14_154180_Prim|150819_UNC17-D00216_0337_AC7JCLANXX_TGACCA_L001	FVB K14-p53-BRCA1 mut	154180	Y	GSE124821-GPL17021
/datastore/nextgenout4/share/labs/bioinformatics/cmp_seq/mouse/rnaseq-output/150514_UNC11-SN627_0400_AC5J46ACXX_GGCTAC_L006/248f865e-e737-4c93-9a21-4659ce0ba103/Salmon_out/quant.sf	/datastore/nextgenout4/share/labs/bioinformatics/cmp_seq/mouse/rnaseq-output/150514_UNC11-SN627_0400_AC5J46ACXX_GGCTAC_L006/248f865e-e737-4c93-9a21-4659ce0ba103/Salmon_out/quant.sf	CP-1268	K14_155877_Prim	K14_155877_Prim	CP-1268|K14_155877_Prim|150824_UNC18-D00493_0255_AC6P35ANXX_TTAGGC_L001	FVB K14-p53-BRCA1 mut	155877	Y	GSE124821-GPL17021
/datastore/nextgenout4/share/labs/bioinformatics/cmp_seq/mouse/rnaseq-output/CP-1948-FVB4-pooledMAMM_GTCCGC_S1_L001/a102aa85-b65d-4ba6-ab12-dc41dbe7ee45/Salmon_out/quant.sf	/datastore/nextgenout4/share/labs/bioinformatics/cmp_seq/mouse/rnaseq-output/CP-1948-FVB4-pooledMAMM_GTCCGC_S1_L001/a102aa85-b65d-4ba6-ab12-dc41dbe7ee45/Salmon_out/quant.sf	CP-1259	K14_157209_Prim	K14_157209_Prim	CP-1259|K14_157209_Prim|150819_UNC17-D00216_0337_AC7JCLANXX_TAGCTT_L004	FVB K14-p53-BRCA1 mut	157209	Y	GSE124821-GPL17021
/datastore/nextgenout4/share/labs/bioinformatics/cmp_seq/mouse/rnaseq-output/CP-1949-FVB5-pooledMAMM_GAGTGG_S3_L001/a25a0057-18a4-48fd-a4d2-3ba9563fb22e/Salmon_out/quant.sf	/datastore/nextgenout4/share/labs/bioinformatics/cmp_seq/mouse/rnaseq-output/CP-1949-FVB5-pooledMAMM_GAGTGG_S3_L001/a25a0057-18a4-48fd-a4d2-3ba9563fb22e/Salmon_out/quant.sf	CP-1252	K14_157391_Prim	K14_157391_Prim	CP-1252|K14_157391_Prim|150819_UNC17-D00216_0337_AC7JCLANXX_TTAGGC_L001	FVB K14-p53-BRCA1 mut	157391	Y	GSE124821-GPL17021
/datastore/nextgenout4/share/labs/bioinformatics/cmp_seq/mouse/rnaseq-output/170728_UNC17-D00216_0461_ACBCGAANXX_GTTTCG_S20_L004/a74e3c2d-6851-47ed-bc85-7f246b0880ed/Salmon_out/quant.sf	/datastore/nextgenout4/share/labs/bioinformatics/cmp_seq/mouse/rnaseq-output/170728_UNC17-D00216_0461_ACBCGAANXX_GTTTCG_S20_L004/a74e3c2d-6851-47ed-bc85-7f246b0880ed/Salmon_out/quant.sf	CP-2008	DH605_NT_KPB_25L	DH605_NT_KPB_25L	CP-2008|DH605_NT_KPB_25L|170505_UNC17-D00216_0440_ACAL2BANXX_ACAGTG_S3_L007	FVB K14-p53-BRCA1 mut	25L	Y	GSE124821-GPL17021
/datastore/nextgenout4/share/labs/bioinformatics/cmp_seq/mouse/rnaseq-output/151202_UNC18-D00493_0277_AC7MG2ANXX_TCCGGAG-GTACTGA_L004/db3c111c-96d9-425b-8ca8-11cd4623e3d6/Salmon_out/quant.sf	/datastore/nextgenout4/share/labs/bioinformatics/cmp_seq/mouse/rnaseq-output/151202_UNC18-D00493_0277_AC7MG2ANXX_TCCGGAG-GTACTGA_L004/db3c111c-96d9-425b-8ca8-11cd4623e3d6/Salmon_out/quant.sf	CP-2006	DH606_kpb25L_NT	DH606_kpb25L_NT	CP-2006|DH606_kpb25L_NT|170505_UNC17-D00216_0440_ACAL2BANXX_TTAGGC_S8_L008	FVB K14-p53-BRCA1 mut	25L	Y	GSE124821-GPL17021
/datastore/nextgenout4/share/labs/bioinformatics/cmp_seq/mouse/rnaseq-output/150814_UNC18-D00493_0253_BC7HR1ANXX_CGATGT_L008/4a38db79-e555-4e9c-a436-7dcc899faff8/Salmon_out/quant.sf	/datastore/nextgenout4/share/labs/bioinformatics/cmp_seq/mouse/rnaseq-output/150814_UNC18-D00493_0253_BC7HR1ANXX_CGATGT_L008/4a38db79-e555-4e9c-a436-7dcc899faff8/Salmon_out/quant.sf	CP-2018	DH625_kpb_25L_nt	DH625_kpb_25L_nt	CP-2018|DH625_kpb_25L_nt|170505_UNC17-D00216_0440_ACAL2BANXX_ATGTCA_S17_L005	FVB K14-p53-BRCA1 mut	25L	Y	GSE124821-GPL17021
/datastore/nextgenout4/share/labs/bioinformatics/cmp_seq/mouse/rnaseq-output/150814_UNC18-D00493_0253_BC7HR1ANXX_ATCACG_L008/168713de-222b-449e-ae30-f13a704fe171/Salmon_out/quant.sf	/datastore/nextgenout4/share/labs/bioinformatics/cmp_seq/mouse/rnaseq-output/150814_UNC18-D00493_0253_BC7HR1ANXX_ATCACG_L008/168713de-222b-449e-ae30-f13a704fe171/Salmon_out/quant.sf	CP-2005	DH627_kpb25L_NT	DH627_kpb25L_NT	CP-2005|DH627_kpb25L_NT|170505_UNC17-D00216_0440_ACAL2BANXX_CGATGT_S6_L008	FVB K14-p53-BRCA1 mut	25L	Y	GSE124821-GPL17021
/datastore/nextgenout4/share/labs/bioinformatics/cmp_seq/mouse/rnaseq-output/150824_UNC18-D00493_0255_AC6P35ANXX_TAGCTT_L004/e6f8e433-69d8-4728-9e4a-b67bba665fd9/Salmon_out/quant.sf	/datastore/nextgenout4/share/labs/bioinformatics/cmp_seq/mouse/rnaseq-output/150824_UNC18-D00493_0255_AC6P35ANXX_TAGCTT_L004/e6f8e433-69d8-4728-9e4a-b67bba665fd9/Salmon_out/quant.sf	CP-2011	DH632_kpb25L_3DAY_nt	DH632_kpb25L_3DAY_nt	CP-2011|DH632_kpb25L_3DAY_nt|170505_UNC17-D00216_0440_ACAL2BANXX_ACTTGA_S4_L007	FVB K14-p53-BRCA1 mut	25L	Y	GSE124821-GPL17021
/datastore/nextgenout4/share/labs/bioinformatics/cmp_seq/mouse/rnaseq-output/150824_UNC18-D00493_0255_AC6P35ANXX_ACTTGA_L003/00744246-dade-482c-8343-6022727241d6/Salmon_out/quant.sf	/datastore/nextgenout4/share/labs/bioinformatics/cmp_seq/mouse/rnaseq-output/150824_UNC18-D00493_0255_AC6P35ANXX_ACTTGA_L003/00744246-dade-482c-8343-6022727241d6/Salmon_out/quant.sf	CP-2004	DH633_kpb25L_3day_NT	DH633_kpb25L_3day_NT	CP-2004|DH633_kpb25L_3day_NT|170505_UNC17-D00216_0440_ACAL2BANXX_ATCACG_S5_L008	FVB K14-p53-BRCA1 mut	25L	Y	GSE124821-GPL17021
/datastore/nextgenout4/share/labs/bioinformatics/cmp_seq/mouse/rnaseq-output/150824_UNC18-D00493_0255_AC6P35ANXX_GGCTAC_L005/81289180-162d-4b70-99a4-2b786119fbed/Salmon_out/quant.sf	/datastore/nextgenout4/share/labs/bioinformatics/cmp_seq/mouse/rnaseq-output/150824_UNC18-D00493_0255_AC6P35ANXX_GGCTAC_L005/81289180-162d-4b70-99a4-2b786119fbed/Salmon_out/quant.sf	CP-2126	DH742_KPB25L_3day_NotTreated	DH742_KPB25L_3day_NotTreated	CP-2126|DH742_KPB25L_3day_NotTreated|170706_UNC18-D00493_0430_ACBBR1ANXX_GTGGCC_S13_L004	FVB K14-p53-BRCA1 mut	25L	Y	GSE124821-GPL17021
/datastore/nextgenout4/share/labs/bioinformatics/cmp_seq/mouse/rnaseq-output/150824_UNC18-D00493_0255_AC6P35ANXX_GATCAG_L004/405d9510-ae60-4114-8b1f-870b83753413/Salmon_out/quant.sf	/datastore/nextgenout4/share/labs/bioinformatics/cmp_seq/mouse/rnaseq-output/150824_UNC18-D00493_0255_AC6P35ANXX_GATCAG_L004/405d9510-ae60-4114-8b1f-870b83753413/Salmon_out/quant.sf	CP-2357	DH904-KPB25L-NT-END-Flow	DH904-KPB25L-NT-END-Flow	CP-2357|DH904-KPB25L-NT-END-Flow|180427_UNC17-D00216_0527_ACCG6GANXX_GATCAG_S3_L007	FVB K14-p53-BRCA1 mut	25L	Y	GSE124821-GPL17021
/datastore/nextgenout4/share/labs/bioinformatics/cmp_seq/mouse/rnaseq-output/150824_UNC18-D00493_0255_AC6P35ANXX_ACAGTG_L002/0a06c601-8bdd-4285-9841-ebca2f4344e2/Salmon_out/quant.sf	/datastore/nextgenout4/share/labs/bioinformatics/cmp_seq/mouse/rnaseq-output/150824_UNC18-D00493_0255_AC6P35ANXX_ACAGTG_L002/0a06c601-8bdd-4285-9841-ebca2f4344e2/Salmon_out/quant.sf	CP-2359	DH905-KPB25L-5mm-Nt-flow	DH905-KPB25L-5mm-Nt-flow	CP-2359|DH905-KPB25L-5mm-Nt-flow|180427_UNC17-D00216_0527_ACCG6GANXX_GGCTAC_S1_L007	FVB K14-p53-BRCA1 mut	25L	Y	GSE124821-GPL17021
/datastore/nextgenout4/share/labs/bioinformatics/cmp_seq/mouse/rnaseq-output/150819_UNC17-D00216_0337_AC7JCLANXX_AGTCAA_L006/a1c1a0b7-f7a6-454d-9427-42699b4812c4/Salmon_out/quant.sf	/datastore/nextgenout4/share/labs/bioinformatics/cmp_seq/mouse/rnaseq-output/150819_UNC17-D00216_0337_AC7JCLANXX_AGTCAA_L006/a1c1a0b7-f7a6-454d-9427-42699b4812c4/Salmon_out/quant.sf	CP-2358	DH907-KPB25L-NT-End-Flow	DH907-KPB25L-NT-End-Flow	CP-2358|DH907-KPB25L-NT-End-Flow|180427_UNC17-D00216_0527_ACCG6GANXX_TAGCTT_S2_L007	FVB K14-p53-BRCA1 mut	25L	Y	GSE124821-GPL17021
/datastore/nextgenout4/share/labs/bioinformatics/cmp_seq/mouse/rnaseq-output/150819_UNC17-D00216_0337_AC7JCLANXX_CCGTCC_L007/063fbbf2-1655-424c-8b16-596262ed1677/Salmon_out/quant.sf	/datastore/nextgenout4/share/labs/bioinformatics/cmp_seq/mouse/rnaseq-output/150819_UNC17-D00216_0337_AC7JCLANXX_CCGTCC_L007/063fbbf2-1655-424c-8b16-596262ed1677/Salmon_out/quant.sf	CP-2360	DH908-KPB25L-5mm-Nt-flow	DH908-KPB25L-5mm-Nt-flow	CP-2360|DH908-KPB25L-5mm-Nt-flow|180427_UNC17-D00216_0527_ACCG6GANXX_CTTGTA_S4_L007	FVB K14-p53-BRCA1 mut	25L	Y	GSE124821-GPL17021
/datastore/nextgenout4/share/labs/bioinformatics/cmp_seq/mouse/rnaseq-output/150819_UNC17-D00216_0337_AC7JCLANXX_GGCTAC_L005/1c682491-9950-4639-876b-1651af7d580f/Salmon_out/quant.sf	/datastore/nextgenout4/share/labs/bioinformatics/cmp_seq/mouse/rnaseq-output/150819_UNC17-D00216_0337_AC7JCLANXX_GGCTAC_L005/1c682491-9950-4639-876b-1651af7d580f/Salmon_out/quant.sf	CP-2416	DH1039-KPB25L-NT-7day	DH1039-KPB25L-NT-7day	CP-2416|DH1039-KPB25L-NT-7day|180503_UNC17-D00216_0529_ACCG06ANXX_CCGTCC_S20_L005	FVB K14-p53-BRCA1 mut	25L_1039	Y	GSE124821-GPL17021
/datastore/nextgenout4/share/labs/bioinformatics/cmp_seq/mouse/rnaseq-output/150819_UNC17-D00216_0337_AC7JCLANXX_CTTGTA_L005/ce43b03f-ce44-4400-a5cb-0c59db3af68d/Salmon_out/quant.sf	/datastore/nextgenout4/share/labs/bioinformatics/cmp_seq/mouse/rnaseq-output/150819_UNC17-D00216_0337_AC7JCLANXX_CTTGTA_L005/ce43b03f-ce44-4400-a5cb-0c59db3af68d/Salmon_out/quant.sf	CP-2413	DH1044-KPB25L-NT-7day	DH1044-KPB25L-NT-7day	CP-2413|DH1044-KPB25L-NT-7day|180503_UNC17-D00216_0529_ACCG06ANXX_AGTCAA_S19_L005	FVB K14-p53-BRCA1 mut	25L_1044	Y	GSE124821-GPL17021
/datastore/nextgenout4/share/labs/bioinformatics/cmp_seq/mouse/rnaseq-output/150819_UNC17-D00216_0337_AC7JCLANXX_GATCAG_L004/7e012650-016a-43eb-98f4-9a03e6749c59/Salmon_out/quant.sf	/datastore/nextgenout4/share/labs/bioinformatics/cmp_seq/mouse/rnaseq-output/150819_UNC17-D00216_0337_AC7JCLANXX_GATCAG_L004/7e012650-016a-43eb-98f4-9a03e6749c59/Salmon_out/quant.sf	CP-2414	DH1044-KPB25L-NT-7day-repeat	DH1044-KPB25L-NT-7day-repeat	CP-2414|DH1044-KPB25L-NT-7day-repeat|180503_UNC17-D00216_0529_ACCG06ANXX_AGTTCC_S18_L005	FVB K14-p53-BRCA1 mut	25L_1044	Y	GSE124821-GPL17021
/datastore/nextgenout4/share/labs/bioinformatics/cmp_seq/mouse/rnaseq-output/150819_UNC17-D00216_0337_AC7JCLANXX_CGATGT_L008/5ee7657f-0c8b-45f0-81f0-7c3fd86b422d/Salmon_out/quant.sf	/datastore/nextgenout4/share/labs/bioinformatics/cmp_seq/mouse/rnaseq-output/150819_UNC17-D00216_0337_AC7JCLANXX_CGATGT_L008/5ee7657f-0c8b-45f0-81f0-7c3fd86b422d/Salmon_out/quant.sf	CP-2415	DH1046-KPB25L-NT-7day	DH1046-KPB25L-NT-7day	CP-2415|DH1046-KPB25L-NT-7day|180503_UNC17-D00216_0529_ACCG06ANXX_ATGTCA_S17_L005	FVB K14-p53-BRCA1 mut	25L_1046	Y	GSE124821-GPL17021
/datastore/nextgenout4/share/labs/bioinformatics/cmp_seq/mouse/rnaseq-output/150819_UNC17-D00216_0337_AC7JCLANXX_ACTTGA_L003/892a5f53-ca94-402a-890f-261d877bea23/Salmon_out/quant.sf	/datastore/nextgenout4/share/labs/bioinformatics/cmp_seq/mouse/rnaseq-output/150819_UNC17-D00216_0337_AC7JCLANXX_ACTTGA_L003/892a5f53-ca94-402a-890f-261d877bea23/Salmon_out/quant.sf	CP-2158	KPB_25L_V1_5_CELL_LINE	KPB_25L_V1_5_CELL_LINE	CP-2158|KPB_25L_V1_5_CELL_LINE|170714_UNC18-D00493_0431_ACB7RRANXX_TGACCA_S21_L005	FVB K14-p53-BRCA1 mut	25L_CL	Y	GSE124821-GPL17021
/datastore/nextgenout4/share/labs/bioinformatics/cmp_seq/mouse/rnaseq-output/150824_UNC18-D00493_0255_AC6P35ANXX_TGACCA_L001/ae917b19-c433-4947-a9ec-6240b8fddaa4/Salmon_out/quant.sf	/datastore/nextgenout4/share/labs/bioinformatics/cmp_seq/mouse/rnaseq-output/150824_UNC18-D00493_0255_AC6P35ANXX_TGACCA_L001/ae917b19-c433-4947-a9ec-6240b8fddaa4/Salmon_out/quant.sf	CP-2382	KPB-25L-CellLine-VALIDATION	KPB-25L-CellLine-VALIDATION	CP-2382|KPB-25L-CellLine-VALIDATION|180427_UNC17-D00216_0527_ACCG6GANXX_TAGCTT_S2_L001	FVB K14-p53-BRCA1 mut	25L_CL_val	Y	GSE124821-GPL17021
/datastore/nextgenout4/share/labs/bioinformatics/cmp_seq/mouse/rnaseq-output/150819_UNC17-D00216_0337_AC7JCLANXX_ATGTCA_L007/a0937637-306d-4b00-a3bf-cc74e9db64e9/Salmon_out/quant.sf	/datastore/nextgenout4/share/labs/bioinformatics/cmp_seq/mouse/rnaseq-output/150819_UNC17-D00216_0337_AC7JCLANXX_ATGTCA_L007/a0937637-306d-4b00-a3bf-cc74e9db64e9/Salmon_out/quant.sf	CP-2306	KM372-KPB1-A-5mm-NT	KM372-KPB1-A-5mm-NT	CP-2306|KM372-KPB1-A-5mm-NT|180308_UNC17-D00216_0512_ACC96VANXX_ATCACG_S5_L008	FVB K14-p53-BRCA1 mut	A_	Y	GSE124821-GPL17021
/datastore/nextgenout4/share/labs/bioinformatics/cmp_seq/mouse/rnaseq-output/150819_UNC17-D00216_0337_AC7JCLANXX_ATCACG_L008/714e7ab1-c98a-45fd-80bd-0a2fba8c9e47/Salmon_out/quant.sf	/datastore/nextgenout4/share/labs/bioinformatics/cmp_seq/mouse/rnaseq-output/150819_UNC17-D00216_0337_AC7JCLANXX_ATCACG_L008/714e7ab1-c98a-45fd-80bd-0a2fba8c9e47/Salmon_out/quant.sf	CP-2308	KM375-KPB1-A-5mm-NT	KM375-KPB1-A-5mm-NT	CP-2308|KM375-KPB1-A-5mm-NT|180308_UNC17-D00216_0512_ACC96VANXX_TTAGGC_S8_L008	FVB K14-p53-BRCA1 mut	A_	Y	GSE124821-GPL17021
/datastore/nextgenout4/share/labs/bioinformatics/cmp_seq/mouse/rnaseq-output/150824_UNC18-D00493_0255_AC6P35ANXX_GCCAAT_L002/9245f5b8-8ca5-451d-8bcb-682cb8930f1e/Salmon_out/quant.sf	/datastore/nextgenout4/share/labs/bioinformatics/cmp_seq/mouse/rnaseq-output/150824_UNC18-D00493_0255_AC6P35ANXX_GCCAAT_L002/9245f5b8-8ca5-451d-8bcb-682cb8930f1e/Salmon_out/quant.sf	CP-2171	FVB-nJ-KPB1-A	FVB-nJ-KPB1-A	CP-2171|FVB-nJ-KPB1-A|170728_UNC17-D00216_0461_ACBCGAANXX_GTTTCG_S20_L004	FVB K14-p53-BRCA1 mut	A_	Y	GSE124821-GPL17021
/datastore/nextgenout4/share/labs/bioinformatics/cmp_seq/mouse/rnaseq-output/150819_UNC17-D00216_0337_AC7JCLANXX_CAGATC_L003/0b6b4543-c163-457e-b948-98db38574640/Salmon_out/quant.sf	/datastore/nextgenout4/share/labs/bioinformatics/cmp_seq/mouse/rnaseq-output/150819_UNC17-D00216_0337_AC7JCLANXX_CAGATC_L003/0b6b4543-c163-457e-b948-98db38574640/Salmon_out/quant.sf	CP-1656	K14-KPB1-A-153560 org	K14-KPB1-A-153560 org	CP-1656|K14-KPB1-A-153560 org|C9T84ANXX_CGTACG_136224_S6_L002	FVB K14-p53-BRCA1 mut	A_153560	Y	GSE124821-GPL17021
/datastore/nextgenout4/share/labs/bioinformatics/cmp_seq/mouse/rnaseq-output/150819_UNC17-D00216_0337_AC7JCLANXX_GCCAAT_L002/ce05a53b-cddd-4d06-8777-c223ac1c52b9/Salmon_out/quant.sf	/datastore/nextgenout4/share/labs/bioinformatics/cmp_seq/mouse/rnaseq-output/150819_UNC17-D00216_0337_AC7JCLANXX_GCCAAT_L002/ce05a53b-cddd-4d06-8777-c223ac1c52b9/Salmon_out/quant.sf	CP-1275	K14_ A_ 159063 _P2	K14_ A_ 159063 _P2	CP-1275|K14_ A_ 159063 _P2|150824_UNC18-D00493_0255_AC6P35ANXX_TAGCTT_L004	FVB K14-p53-BRCA1 mut	A_159063	Y	GSE124821-GPL17021
/datastore/nextgenout4/share/labs/bioinformatics/cmp_seq/mouse/rnaseq-output/150819_UNC17-D00216_0337_AC7JCLANXX_TGACCA_L001/adae79d4-9e51-44bc-b79f-00b2bb187015/Salmon_out/quant.sf	/datastore/nextgenout4/share/labs/bioinformatics/cmp_seq/mouse/rnaseq-output/150819_UNC17-D00216_0337_AC7JCLANXX_TGACCA_L001/adae79d4-9e51-44bc-b79f-00b2bb187015/Salmon_out/quant.sf	CP-1273	K14_ A_ 166044 _P4	K14_ A_ 166044 _P4	CP-1273|K14_ A_ 166044 _P4|150824_UNC18-D00493_0255_AC6P35ANXX_ACTTGA_L003	FVB K14-p53-BRCA1 mut	A_166044	Y	GSE124821-GPL17021
/datastore/nextgenout4/share/labs/bioinformatics/cmp_seq/mouse/rnaseq-output/150824_UNC18-D00493_0255_AC6P35ANXX_TTAGGC_L001/0181a194-544a-4afc-91ff-31b010b3c20b/Salmon_out/quant.sf	/datastore/nextgenout4/share/labs/bioinformatics/cmp_seq/mouse/rnaseq-output/150824_UNC18-D00493_0255_AC6P35ANXX_TTAGGC_L001/0181a194-544a-4afc-91ff-31b010b3c20b/Salmon_out/quant.sf	CP-908	KPB1-A 173328	KPB1-A 173328	CP-908|KPB1-A 173328|140624_UNC12-SN629_0375_AC4K57ACXX_CGATGT_L003	FVB K14-p53-BRCA1 mut	A_173328	Y	GSE124821-GPL13112
/datastore/nextgenout4/share/labs/bioinformatics/cmp_seq/mouse/rnaseq-output/150819_UNC17-D00216_0337_AC7JCLANXX_TAGCTT_L004/f1f59f86-2213-44c5-83a2-cd0815abebc2/Salmon_out/quant.sf	/datastore/nextgenout4/share/labs/bioinformatics/cmp_seq/mouse/rnaseq-output/150819_UNC17-D00216_0337_AC7JCLANXX_TAGCTT_L004/f1f59f86-2213-44c5-83a2-cd0815abebc2/Salmon_out/quant.sf	CP-909	KPB1-A 173329	KPB1-A 173329	CP-909|KPB1-A 173329|140624_UNC12-SN629_0375_AC4K57ACXX_TGACCA_L003	FVB K14-p53-BRCA1 mut	A_173329	Y	GSE124821-GPL13112
/datastore/nextgenout4/share/labs/bioinformatics/cmp_seq/mouse/rnaseq-output/150819_UNC17-D00216_0337_AC7JCLANXX_TTAGGC_L001/598d46cd-fde2-4815-8f8c-5194d800edf4/Salmon_out/quant.sf	/datastore/nextgenout4/share/labs/bioinformatics/cmp_seq/mouse/rnaseq-output/150819_UNC17-D00216_0337_AC7JCLANXX_TTAGGC_L001/598d46cd-fde2-4815-8f8c-5194d800edf4/Salmon_out/quant.sf	CP-1657	K14-KPB1-A-CC264	K14-KPB1-A-CC264	CP-1657|K14-KPB1-A-CC264|C9T84ANXX_GAGTGG_136226_S3_L001	FVB K14-p53-BRCA1 mut	A_CC264	Y	GSE124821-GPL17021
/datastore/nextgenout4/share/labs/bioinformatics/cmp_seq/mouse/rnaseq-output/C9T84ANXX_CGTACG_136224_S6_L002/7e059533-c277-459a-9cc0-549646b6f2a7/Salmon_out/quant.sf	/datastore/nextgenout4/share/labs/bioinformatics/cmp_seq/mouse/rnaseq-output/C9T84ANXX_CGTACG_136224_S6_L002/7e059533-c277-459a-9cc0-549646b6f2a7/Salmon_out/quant.sf	CP-2160	KPB_EF1A_APOBEC_CELL_LINE	KPB_EF1A_APOBEC_CELL_LINE	CP-2160|KPB_EF1A_APOBEC_CELL_LINE|170714_UNC18-D00493_0431_ACB7RRANXX_GCCAAT_S27_L006	FVB K14-p53-BRCA1 mut	APB_CL	Y	GSE124821-GPL17021
/datastore/nextgenout4/share/labs/bioinformatics/cmp_seq/mouse/rnaseq-output/C9T84ANXX_GAGTGG_136226_S3_L001/9c19ce41-258d-4d29-93ec-76d3100da9c4/Salmon_out/quant.sf	/datastore/nextgenout4/share/labs/bioinformatics/cmp_seq/mouse/rnaseq-output/C9T84ANXX_GAGTGG_136226_S3_L001/9c19ce41-258d-4d29-93ec-76d3100da9c4/Salmon_out/quant.sf	CP-1659	K14-KPB1-B-154160 org	K14-KPB1-B-154160 org	CP-1659|K14-KPB1-B-154160 org|C9T84ANXX_ATTCCT_136228_S1_L001	FVB K14-p53-BRCA1 mut	B_154160	Y	GSE124821-GPL17021
/datastore/nextgenout4/share/labs/bioinformatics/cmp_seq/mouse/rnaseq-output/C9T84ANXX_ATTCCT_136228_S1_L001/0fbd60e0-57b8-45bb-bf9b-b89bdeb752c9/Salmon_out/quant.sf	/datastore/nextgenout4/share/labs/bioinformatics/cmp_seq/mouse/rnaseq-output/C9T84ANXX_ATTCCT_136228_S1_L001/0fbd60e0-57b8-45bb-bf9b-b89bdeb752c9/Salmon_out/quant.sf	CP-1276	K14_ B_ 159063 _P2	K14_ B_ 159063 _P2	CP-1276|K14_ B_ 159063 _P2|150824_UNC18-D00493_0255_AC6P35ANXX_GGCTAC_L005	FVB K14-p53-BRCA1 mut	B_159063	Y	GSE124821-GPL17021
/datastore/nextgenout4/share/labs/bioinformatics/cmp_seq/mouse/rnaseq-output/C9T7VANXX_ATCACG_136676_S22_L008/9b2e832d-0a3c-4828-80ca-9956b6955c19/Salmon_out/quant.sf	/datastore/nextgenout4/share/labs/bioinformatics/cmp_seq/mouse/rnaseq-output/C9T7VANXX_ATCACG_136676_S22_L008/9b2e832d-0a3c-4828-80ca-9956b6955c19/Salmon_out/quant.sf	CP-1274	K14_ B_ 160997 _P4	K14_ B_ 160997 _P4	CP-1274|K14_ B_ 160997 _P4|150824_UNC18-D00493_0255_AC6P35ANXX_GATCAG_L004	FVB K14-p53-BRCA1 mut	B_160997	Y	GSE124821-GPL17021
/datastore/nextgenout4/share/labs/bioinformatics/cmp_seq/mouse/rnaseq-output/180110_UNC18-D00493_0484_BCC2J8ANXX_GTCCGC_S1_L001/024b4483-5acf-4923-b7c2-20be044fccd4/Salmon_out/quant.sf	/datastore/nextgenout5/share/labs/bioinformatics/seqware/mouse_test_run/rnaseq-output/180110_UNC18-D00493_0484_BCC2J8ANXX_GTCCGC_S1_L001/024b4483-5acf-4923-b7c2-20be044fccd4/Salmon_out/quant.sf	CP-910	KPB1-B 173334	KPB1-B 173334	CP-910|KPB1-B 173334|140624_UNC12-SN629_0375_AC4K57ACXX_AGTCAA_L004	FVB K14-p53-BRCA1 mut	B_173334	Y	GSE124821-GPL13112
/datastore/nextgenout4/share/labs/bioinformatics/cmp_seq/mouse/rnaseq-output/180110_UNC18-D00493_0484_BCC2J8ANXX_GTGAAA_S2_L001/21541091-a684-48c7-8d76-d75ed13f01c2/Salmon_out/quant.sf	/datastore/nextgenout5/share/labs/bioinformatics/seqware/mouse_test_run/rnaseq-output/180110_UNC18-D00493_0484_BCC2J8ANXX_GTGAAA_S2_L001/21541091-a684-48c7-8d76-d75ed13f01c2/Salmon_out/quant.sf	CP-911	KPB1-B 173335	KPB1-B 173335	CP-911|KPB1-B 173335|140624_UNC12-SN629_0375_AC4K57ACXX_AGTTCC_L004	FVB K14-p53-BRCA1 mut	B_173335	Y	GSE124821-GPL13112
/datastore/nextgenout4/share/labs/bioinformatics/cmp_seq/mouse/rnaseq-output/180110_UNC18-D00493_0484_BCC2J8ANXX_GTTTCG_S4_L001/13f9c2a9-930e-4e2e-9ddc-aab7314eec07/Salmon_out/quant.sf	/datastore/nextgenout5/share/labs/bioinformatics/seqware/mouse_test_run/rnaseq-output/180110_UNC18-D00493_0484_BCC2J8ANXX_GTTTCG_S4_L001/13f9c2a9-930e-4e2e-9ddc-aab7314eec07/Salmon_out/quant.sf	CP-1660	K14-KPB1-B-CC215	K14-KPB1-B-CC215	CP-1660|K14-KPB1-B-CC215|C9T7VANXX_ATCACG_136676_S22_L008	FVB K14-p53-BRCA1 mut	B_CC215	Y	GSE124821-GPL17021
/datastore/nextgenout4/share/labs/bioinformatics/cmp_seq/mouse/rnaseq-output/180110_UNC18-D00493_0484_BCC2J8ANXX_GTGGCC_S3_L001/b3af3ef6-18c7-42da-9f64-fcd4af55e6a4/Salmon_out/quant.sf	/datastore/nextgenout5/share/labs/bioinformatics/seqware/mouse_test_run/rnaseq-output/180110_UNC18-D00493_0484_BCC2J8ANXX_GTGGCC_S3_L001/b3af3ef6-18c7-42da-9f64-fcd4af55e6a4/Salmon_out/quant.sf	CP-1492	Neu-NT7d-164606	Neu-NT7d-164606	CP-1492|Neu-NT7d-164606|160520_UNC18-D00493_0321_BC8RY2ANXX_GTTTCG_L006	FVB MMTV-neu	164606	Y	GSE148482
/datastore/nextgenout4/share/labs/bioinformatics/cmp_seq/mouse/rnaseq-output/180110_UNC18-D00493_0484_BCC2J8ANXX_ATCACG_S17_L005/794f9a3d-6a14-4902-baf2-b7ada34d3abc/Salmon_out/quant.sf	/datastore/nextgenout5/share/labs/bioinformatics/seqware/mouse_test_run/rnaseq-output/180110_UNC18-D00493_0484_BCC2J8ANXX_ATCACG_S17_L005/794f9a3d-6a14-4902-baf2-b7ada34d3abc/Salmon_out/quant.sf	CP-1288	Neu-NT7d-LH73	Neu-NT7d-LH73	CP-1288|Neu-NT7d-LH73|151028_UNC18-D00493_0270_AC7JFJANXX_ATCACG_L008	FVB MMTV-neu	LH73	Y	GSE148482
/datastore/nextgenout4/share/labs/bioinformatics/cmp_seq/mouse/rnaseq-output/180110_UNC18-D00493_0484_BCC2J8ANXX_CGATGT_S18_L005/f24e2397-9b3d-4973-aba3-6cddedbc6209/Salmon_out/quant.sf	/datastore/nextgenout5/share/labs/bioinformatics/seqware/mouse_test_run/rnaseq-output/180110_UNC18-D00493_0484_BCC2J8ANXX_CGATGT_S18_L005/f24e2397-9b3d-4973-aba3-6cddedbc6209/Salmon_out/quant.sf	CP-1289	Neu-NT7d-LH84	Neu-NT7d-LH84	CP-1289|Neu-NT7d-LH84|151028_UNC18-D00493_0270_AC7JFJANXX_CGATGT_L008	FVB MMTV-neu	LH84	Y	GSE148482
/datastore/nextgenout4/share/labs/bioinformatics/cmp_seq/mouse/rnaseq-output/180110_UNC18-D00493_0484_BCC2J8ANXX_TTAGGC_S19_L005/20af8645-e87f-40e8-8d0d-a5bb32178eff/Salmon_out/quant.sf	/datastore/nextgenout5/share/labs/bioinformatics/seqware/mouse_test_run/rnaseq-output/180110_UNC18-D00493_0484_BCC2J8ANXX_TTAGGC_S19_L005/20af8645-e87f-40e8-8d0d-a5bb32178eff/Salmon_out/quant.sf	CP-1033	Wnt1-167209	Wnt1-167209	CP-1033|Wnt1-167209|141208_UNC16-SN851_0493_BHBBEGADXX_GTGAAA_L001	FVB MMTV-wnt1	167209	Y	GSE118164-GPL13112
/datastore/nextgenout4/share/labs/bioinformatics/cmp_seq/mouse/rnaseq-output/180110_UNC18-D00493_0484_BCC2J8ANXX_TGACCA_S20_L005/331f0832-e401-4ac4-81da-a3f1a37e99d9/Salmon_out/quant.sf	/datastore/nextgenout5/share/labs/bioinformatics/seqware/mouse_test_run/rnaseq-output/180110_UNC18-D00493_0484_BCC2J8ANXX_TGACCA_S20_L005/331f0832-e401-4ac4-81da-a3f1a37e99d9/Salmon_out/quant.sf	CP-1032	Wnt1-168508	Wnt1-168508	CP-1032|Wnt1-168508|141208_UNC16-SN851_0493_BHBBEGADXX_CTTGTA_L001	FVB MMTV-wnt1	168508	Y	GSE118164-GPL13112
/datastore/nextgenout4/share/labs/bioinformatics/cmp_seq/mouse/rnaseq-output/180308_UNC17-D00216_0512_ACC96VANXX_ATCACG_S5_L008/fbea9f4d-c13a-4888-bb36-ea4cc952da92/Salmon_out/quant.sf	/datastore/nextgenout5/share/labs/bioinformatics/seqware/cmp_seq_temp_folder/mouse/rnaseq-output/180308_UNC17-D00216_0512_ACC96VANXX_ATCACG_S5_L008/fbea9f4d-c13a-4888-bb36-ea4cc952da92/Salmon_out/quant.sf	CP-1034	Wnt1-169918	Wnt1-169918	CP-1034|Wnt1-169918|141208_UNC16-SN851_0493_BHBBEGADXX_CAGATC_L002	FVB MMTV-wnt1	169918	Y	GSE118164-GPL13112
/datastore/nextgenout4/share/labs/bioinformatics/cmp_seq/mouse/rnaseq-output/180308_UNC17-D00216_0512_ACC96VANXX_TTAGGC_S8_L008/74385adb-9b69-47dd-aafb-f9910b6e4f75/Salmon_out/quant.sf	/datastore/nextgenout5/share/labs/bioinformatics/seqware/cmp_seq_temp_folder/mouse/rnaseq-output/180308_UNC17-D00216_0512_ACC96VANXX_TTAGGC_S8_L008/74385adb-9b69-47dd-aafb-f9910b6e4f75/Salmon_out/quant.sf	CP-905	Wnt1 169927.1	Wnt1 169927.1	CP-905|Wnt1 169927.1|140624_UNC12-SN629_0375_AC4K57ACXX_CTTGTA_L001	FVB MMTV-wnt1	169927	Y	GSE118164-GPL13112
/datastore/nextgenout4/share/labs/bioinformatics/cmp_seq/mouse/rnaseq-output/180427_UNC17-D00216_0528_BCCH2PANXX_ATCACG_S9_L005/d5a9c37d-e019-4977-8993-f25dedae4396/Salmon_out/quant.sf	/datastore/nextgenout5/share/labs/bioinformatics/seqware/cmp_seq_temp_folder/mouse/rnaseq-output/180427_UNC17-D00216_0528_BCCH2PANXX_ATCACG_S9_L005/d5a9c37d-e019-4977-8993-f25dedae4396/Salmon_out/quant.sf	CP-906	Wnt1 169927.2	Wnt1 169927.2	CP-906|Wnt1 169927.2|140624_UNC12-SN629_0375_AC4K57ACXX_ACAGTG_L002	FVB MMTV-wnt1	169927	Y	GSE118164-GPL13112
/datastore/nextgenout4/share/labs/bioinformatics/cmp_seq/mouse/rnaseq-output/180427_UNC17-D00216_0528_BCCH2PANXX_TGACCA_S12_L005/8208c785-e08c-4bf2-8918-ff217a23ce48/Salmon_out/quant.sf	/datastore/nextgenout5/share/labs/bioinformatics/seqware/cmp_seq_temp_folder/mouse/rnaseq-output/180427_UNC17-D00216_0528_BCCH2PANXX_TGACCA_S12_L005/8208c785-e08c-4bf2-8918-ff217a23ce48/Salmon_out/quant.sf	CP-907	Wnt1 171053	Wnt1 171053	CP-907|Wnt1 171053|140624_UNC12-SN629_0375_AC4K57ACXX_GTGAAA_L002	FVB MMTV-wnt1	171053	Y	GSE118164-GPL13112
/datastore/nextgenout4/share/labs/bioinformatics/cmp_seq/mouse/rnaseq-output/180427_UNC17-D00216_0528_BCCH2PANXX_TTAGGC_S10_L005/d29730d3-bb66-4624-b8fb-1b88518c3d70/Salmon_out/quant.sf	/datastore/nextgenout5/share/labs/bioinformatics/seqware/cmp_seq_temp_folder/mouse/rnaseq-output/180427_UNC17-D00216_0528_BCCH2PANXX_TTAGGC_S10_L005/d29730d3-bb66-4624-b8fb-1b88518c3d70/Salmon_out/quant.sf	CP-1036	Wnt1-171979	Wnt1-171979	CP-1036|Wnt1-171979|141210_UNC11-SN627_0391_AC5FVDACXX_AGTCAA_L001	FVB MMTV-wnt1	171979	Y	GSE118164-GPL13112
/datastore/nextgenout4/share/labs/bioinformatics/cmp_seq/mouse/rnaseq-output/180427_UNC17-D00216_0528_BCCH2PANXX_CGATGT_S11_L005/58715ccd-5754-4a16-8aa0-398709de04bb/Salmon_out/quant.sf	/datastore/nextgenout5/share/labs/bioinformatics/seqware/cmp_seq_temp_folder/mouse/rnaseq-output/180427_UNC17-D00216_0528_BCCH2PANXX_CGATGT_S11_L005/58715ccd-5754-4a16-8aa0-398709de04bb/Salmon_out/quant.sf	CP-1035	Wnt1-171984	Wnt1-171984	CP-1035|Wnt1-171984|141208_UNC16-SN851_0493_BHBBEGADXX_ACAGTG_L002	FVB MMTV-wnt1	171984	Y	GSE118164-GPL13112
/datastore/nextgenout4/share/labs/bioinformatics/cmp_seq/mouse/rnaseq-output/170714_UNC18-D00493_0431_ACB7RRANXX_TGACCA_S21_L005/34a3b2a7-5458-4b68-90c7-aaf363cae226/Salmon_out/quant.sf	/datastore/nextgenout4/share/labs/bioinformatics/cmp_seq/mouse/rnaseq-output/170714_UNC18-D00493_0431_ACB7RRANXX_TGACCA_S21_L005/34a3b2a7-5458-4b68-90c7-aaf363cae226/Salmon_out/quant.sf	CP-1030	Wnt1-172499	Wnt1-172499	CP-1030|Wnt1-172499|141210_UNC11-SN627_0391_AC5FVDACXX_CGATGT_L002	FVB MMTV-wnt1	172499	Y	GSE118164-GPL13112
/datastore/nextgenout4/share/labs/bioinformatics/cmp_seq/mouse/rnaseq-output/170714_UNC18-D00493_0431_ACB7RRANXX_GCCAAT_S27_L006/7249e430-40f0-41fe-9004-3eb6d24002f8/Salmon_out/quant.sf	/datastore/nextgenout4/share/labs/bioinformatics/cmp_seq/mouse/rnaseq-output/170714_UNC18-D00493_0431_ACB7RRANXX_GCCAAT_S27_L006/7249e430-40f0-41fe-9004-3eb6d24002f8/Salmon_out/quant.sf	CP-1031	Wnt1-468512	Wnt1-468512	CP-1031|Wnt1-468512|141210_UNC11-SN627_0391_AC5FVDACXX_TGACCA_L002	FVB MMTV-wnt1	468512	Y	GSE118164-GPL13112
/datastore/nextgenout4/share/labs/bioinformatics/cmp_seq/mouse/rnaseq-output/140624_UNC12-SN629_0375_AC4K57ACXX_CGATGT_L003/98e1989a-a498-44b2-a068-d52cc35b65d8/Salmon_out/quant.sf	/datastore/nextgenout4/share/labs/bioinformatics/cmp_seq/mouse/rnaseq-output/140624_UNC12-SN629_0375_AC4K57ACXX_CGATGT_L003/98e1989a-a498-44b2-a068-d52cc35b65d8/Salmon_out/quant.sf	CP-1207	FVB_MMTV_Wnt1_123070_Early	FVB_MMTV_Wnt1_123070	CP-1207|FVB_MMTV_Wnt1_123070_Early|150501_UNC15-SN850_0405_BC5HCYACXX_CTTGTA_L008	FVB MMTV-wnt1	123070_Early	Y	GSE118164-GPL11383
/datastore/nextgenout4/share/labs/bioinformatics/cmp_seq/mouse/rnaseq-output/140624_UNC12-SN629_0375_AC4K57ACXX_TGACCA_L003/4e0dfbfd-835f-47ff-8fda-f53b4d8decd4/Salmon_out/quant.sf	/datastore/nextgenout4/share/labs/bioinformatics/cmp_seq/mouse/rnaseq-output/140624_UNC12-SN629_0375_AC4K57ACXX_TGACCA_L003/4e0dfbfd-835f-47ff-8fda-f53b4d8decd4/Salmon_out/quant.sf	CP-1218	FVB_MMTV_Wnt1_123114_Late	FVB_MMTV_Wnt1_123114	CP-1218|FVB_MMTV_Wnt1_123114_Late|150514_UNC11-SN627_0400_AC5J46ACXX_ACTGAT_L007	FVB MMTV-wnt1	123114_Late	Y	GSE118164-GPL11383
/datastore/nextgenout4/share/labs/bioinformatics/cmp_seq/mouse/rnaseq-output/140624_UNC12-SN629_0375_AC4K57ACXX_AGTCAA_L004/05e88d6c-e163-4c0c-a202-58dd15c033f0/Salmon_out/quant.sf	/datastore/nextgenout4/share/labs/bioinformatics/cmp_seq/mouse/rnaseq-output/140624_UNC12-SN629_0375_AC4K57ACXX_AGTCAA_L004/05e88d6c-e163-4c0c-a202-58dd15c033f0/Salmon_out/quant.sf	CP-1219	FVB_MMTV_Wnt1_123420_Late	FVB_MMTV_Wnt1_123420	CP-1219|FVB_MMTV_Wnt1_123420_Late|150430_UNC12-SN629_0408_BC5HJ9ACXX_ATTCCT_L004	FVB MMTV-wnt1	123420_Late	Y	GSE118164-GPL11383
/datastore/nextgenout4/share/labs/bioinformatics/cmp_seq/mouse/rnaseq-output/140624_UNC12-SN629_0375_AC4K57ACXX_AGTTCC_L004/aa725c56-fbba-4903-bfe6-ab54286cbe15/Salmon_out/quant.sf	/datastore/nextgenout4/share/labs/bioinformatics/cmp_seq/mouse/rnaseq-output/140624_UNC12-SN629_0375_AC4K57ACXX_AGTTCC_L004/aa725c56-fbba-4903-bfe6-ab54286cbe15/Salmon_out/quant.sf	CP-1208	FVB_MMTV_Wnt1_123738_Early	FVB_MMTV_Wnt1_123738	CP-1208|FVB_MMTV_Wnt1_123738_Early|150501_UNC15-SN850_0405_BC5HCYACXX_AGTCAA_L008	FVB MMTV-wnt1	123738_Early	Y	GSE118164-GPL11383
/datastore/nextgenout4/share/labs/bioinformatics/cmp_seq/mouse/rnaseq-output/180427_UNC17-D00216_0527_ACCG6GANXX_TAGCTT_S2_L001/6a14c108-ea68-4c68-8c76-1b5cbc27df27/Salmon_out/quant.sf	/datastore/nextgenout5/share/labs/bioinformatics/seqware/cmp_seq_temp_folder/mouse/rnaseq-output/180427_UNC17-D00216_0527_ACCG6GANXX_TAGCTT_S2_L001/6a14c108-ea68-4c68-8c76-1b5cbc27df27/Salmon_out/quant.sf	CP-1215	FVB_MMTV_Wnt1_124326_Late	FVB_MMTV_Wnt1_124326	CP-1215|FVB_MMTV_Wnt1_124326_Late|150501_UNC15-SN850_0405_BC5HCYACXX_GTTTCG_L005	FVB MMTV-wnt1	124326_Late	Y	GSE118164-GPL11383
/datastore/nextgenout4/share/labs/bioinformatics/cmp_seq/mouse/rnaseq-output/170505_UNC17-D00216_0441_BCAVF1ANXX_ACTGAT_S17_L005/e16b6ac6-b5d8-4bf2-bdfc-124f0fe1357b/Salmon_out/quant.sf	/datastore/nextgenout4/share/labs/bioinformatics/cmp_seq/mouse/rnaseq-output/170505_UNC17-D00216_0441_BCAVF1ANXX_ACTGAT_S17_L005/e16b6ac6-b5d8-4bf2-bdfc-124f0fe1357b/Salmon_out/quant.sf	CP-1209	FVB_MMTV_Wnt1_124328_Early	FVB_MMTV_Wnt1_124328	CP-1209|FVB_MMTV_Wnt1_124328_Early|150514_UNC11-SN627_0400_AC5J46ACXX_AGTTCC_L006	FVB MMTV-wnt1	124328_Early	Y	GSE118164-GPL11383
/datastore/nextgenout4/share/labs/bioinformatics/cmp_seq/mouse/rnaseq-output/170505_UNC17-D00216_0441_BCAVF1ANXX_GTTTCG_S23_L006/9d7d0fb1-d1cb-4a26-a392-d6a2e8bc913a/Salmon_out/quant.sf	/datastore/nextgenout4/share/labs/bioinformatics/cmp_seq/mouse/rnaseq-output/170505_UNC17-D00216_0441_BCAVF1ANXX_GTTTCG_S23_L006/9d7d0fb1-d1cb-4a26-a392-d6a2e8bc913a/Salmon_out/quant.sf	CP-1217	FVB_MMTV_Wnt1_125285_Late	FVB_MMTV_Wnt1_125285	CP-1217|FVB_MMTV_Wnt1_125285_Late|150514_UNC11-SN627_0400_AC5J46ACXX_GAGTGG_L007	FVB MMTV-wnt1	125285_Late	Y	GSE118164-GPL11383
/datastore/nextgenout4/share/labs/bioinformatics/cmp_seq/mouse/rnaseq-output/170505_UNC17-D00216_0441_BCAVF1ANXX_GAGTGG_S18_L005/fd3b3689-6300-45b5-87fd-df797f992aa4/Salmon_out/quant.sf	/datastore/nextgenout4/share/labs/bioinformatics/cmp_seq/mouse/rnaseq-output/170505_UNC17-D00216_0441_BCAVF1ANXX_GAGTGG_S18_L005/fd3b3689-6300-45b5-87fd-df797f992aa4/Salmon_out/quant.sf	CP-1216	FVB_MMTV_Wnt1_125673_Late	FVB_MMTV_Wnt1_125673	CP-1216|FVB_MMTV_Wnt1_125673_Late|150501_UNC15-SN850_0405_BC5HCYACXX_CGTACG_L007	FVB MMTV-wnt1	125673_Late	Y	GSE118164-GPL11383
/datastore/nextgenout4/share/labs/bioinformatics/cmp_seq/mouse/rnaseq-output/170505_UNC17-D00216_0441_BCAVF1ANXX_CGTACG_S19_L005/bb44a172-dded-4c5c-b9e8-54dbd3467677/Salmon_out/quant.sf	/datastore/nextgenout4/share/labs/bioinformatics/cmp_seq/mouse/rnaseq-output/170505_UNC17-D00216_0441_BCAVF1ANXX_CGTACG_S19_L005/bb44a172-dded-4c5c-b9e8-54dbd3467677/Salmon_out/quant.sf	CP-1211	FVB_MMTV_Wnt1_126355_Early	FVB_MMTV_Wnt1_126355	CP-1211|FVB_MMTV_Wnt1_126355_Early|150514_UNC11-SN627_0400_AC5J46ACXX_CCGTCC_L005	FVB MMTV-wnt1	126355_Early	Y	GSE118164-GPL11383
/datastore/nextgenout4/share/labs/bioinformatics/cmp_seq/mouse/rnaseq-output/160520_UNC18-D00493_0321_BC8RY2ANXX_GTTTCG_L006/4a093895-68a3-40d3-9c04-8729a518dd6b/Salmon_out/quant.sf	/datastore/nextgenout4/share/labs/bioinformatics/cmp_seq/mouse/rnaseq-output/160520_UNC18-D00493_0321_BC8RY2ANXX_GTTTCG_L006/4a093895-68a3-40d3-9c04-8729a518dd6b/Salmon_out/quant.sf	CP-1212	FVB_MMTV_Wnt1_172215_Late	FVB_MMTV_Wnt1_172215	CP-1212|FVB_MMTV_Wnt1_172215_Late|150514_UNC11-SN627_0400_AC5J46ACXX_GTCCGC_L005	FVB MMTV-wnt1	172215_Late	Y	GSE118164-GPL11383
/datastore/nextgenout4/share/labs/bioinformatics/cmp_seq/mouse/rnaseq-output/151028_UNC18-D00493_0270_AC7JFJANXX_ATCACG_L008/f74af4b0-653e-4dc8-9bbb-b56c04dfdadd/Salmon_out/quant.sf	/datastore/nextgenout4/share/labs/bioinformatics/cmp_seq/mouse/rnaseq-output/151028_UNC18-D00493_0270_AC7JFJANXX_ATCACG_L008/f74af4b0-653e-4dc8-9bbb-b56c04dfdadd/Salmon_out/quant.sf	CP-1213	FVB_MMTV_Wnt1_174861_Late	FVB_MMTV_Wnt1_174861	CP-1213|FVB_MMTV_Wnt1_174861_Late|150501_UNC15-SN850_0405_BC5HCYACXX_GTGAAA_L006	FVB MMTV-wnt1	174861_Late	Y	GSE118164-GPL11383
/datastore/nextgenout4/share/labs/bioinformatics/cmp_seq/mouse/rnaseq-output/151028_UNC18-D00493_0270_AC7JFJANXX_CGATGT_L008/622fb3db-3639-48c4-b193-eeaee29aa140/Salmon_out/quant.sf	/datastore/nextgenout4/share/labs/bioinformatics/cmp_seq/mouse/rnaseq-output/151028_UNC18-D00493_0270_AC7JFJANXX_CGATGT_L008/622fb3db-3639-48c4-b193-eeaee29aa140/Salmon_out/quant.sf	CP-1214	FVB_MMTV_Wnt1_175317_Late	FVB_MMTV_Wnt1_175317	CP-1214|FVB_MMTV_Wnt1_175317_Late|150430_UNC12-SN629_0408_BC5HJ9ACXX_GTGGCC_L004	FVB MMTV-wnt1	175317_Late	Y	GSE118164-GPL11383
/datastore/nextgenout4/share/labs/bioinformatics/cmp_seq/mouse/rnaseq-output/CP-1896-PYMT-2139-4-E2FWT-ST_GTCCGC_S1_L001/65cdf6cb-afd8-4917-b088-ed4d70408e78/Salmon_out/quant.sf	/datastore/nextgenout4/share/labs/bioinformatics/cmp_seq/mouse/rnaseq-output/CP-1896-PYMT-2139-4-E2FWT-ST_GTCCGC_S1_L001/65cdf6cb-afd8-4917-b088-ed4d70408e78/Salmon_out/quant.sf	CP-1210	FVB_MMTV_Wnt1_182281_Early	FVB_MMTV_Wnt1_182281	CP-1210|FVB_MMTV_Wnt1_182281_Early|150514_UNC11-SN627_0400_AC5J46ACXX_ATGTCA_L005	FVB MMTV-wnt1	182281_Early	Y	GSE118164-GPL11383
/datastore/nextgenout4/share/labs/bioinformatics/cmp_seq/mouse/rnaseq-output/CP-1897-PYMT-2680-1-E2FWT-ST_GTGAAA_S3_L001/c93e55e9-d5ab-434e-b6a6-cb87e7f02699/Salmon_out/quant.sf	/datastore/nextgenout4/share/labs/bioinformatics/cmp_seq/mouse/rnaseq-output/CP-1897-PYMT-2680-1-E2FWT-ST_GTGAAA_S3_L001/c93e55e9-d5ab-434e-b6a6-cb87e7f02699/Salmon_out/quant.sf	CP-1204	FVB_MMTV_Wnt1_182352_Early	FVB_MMTV_Wnt1_182352	CP-1204|FVB_MMTV_Wnt1_182352_Early|150501_UNC15-SN850_0405_BC5HCYACXX_GATCAG_L007	FVB MMTV-wnt1	182352_Early	Y	GSE118164-GPL11383
/datastore/nextgenout4/share/labs/bioinformatics/cmp_seq/mouse/rnaseq-output/CP-1899-PYMT-3136-5-E2FWT-ST_GTTTCG_L008/26140edc-e321-4e83-8c93-86bc3f83e152/Salmon_out/quant.sf	/datastore/nextgenout4/share/labs/bioinformatics/cmp_seq/mouse/rnaseq-output/CP-1899-PYMT-3136-5-E2FWT-ST_GTTTCG_L008/26140edc-e321-4e83-8c93-86bc3f83e152/Salmon_out/quant.sf	CP-1205	FVB_MMTV_Wnt1_183983_Early	FVB_MMTV_Wnt1_183983	CP-1205|FVB_MMTV_Wnt1_183983_Early|150501_UNC15-SN850_0405_BC5HCYACXX_TAGCTT_L007	FVB MMTV-wnt1	183983_Early	Y	GSE118164-GPL11383
/datastore/nextgenout4/share/labs/bioinformatics/cmp_seq/mouse/rnaseq-output/CP-1900-PYMT-455-3-E2FWT-ST_CGTACG_L008/38125bcb-5995-4da8-b6bc-f513c8234de9/Salmon_out/quant.sf	/datastore/nextgenout4/share/labs/bioinformatics/cmp_seq/mouse/rnaseq-output/CP-1900-PYMT-455-3-E2FWT-ST_CGTACG_L008/38125bcb-5995-4da8-b6bc-f513c8234de9/Salmon_out/quant.sf	CP-1206	FVB_MMTV_Wnt1_183984_Early	FVB_MMTV_Wnt1_183984	CP-1206|FVB_MMTV_Wnt1_183984_Early|150514_UNC11-SN627_0400_AC5J46ACXX_GGCTAC_L006	FVB MMTV-wnt1	183984_Early	Y	GSE118164-GPL11383
/datastore/nextgenout4/share/labs/bioinformatics/cmp_seq/mouse/rnaseq-output/CP-1898-PYMT-628-3-E2FWT-ST_GTGGCC_L008/81b459cc-8ba9-4ffd-b5aa-94335565bfdd/Salmon_out/quant.sf	/datastore/nextgenout4/share/labs/bioinformatics/cmp_seq/mouse/rnaseq-output/CP-1898-PYMT-628-3-E2FWT-ST_GTGGCC_L008/81b459cc-8ba9-4ffd-b5aa-94335565bfdd/Salmon_out/quant.sf	CP-1900	PYMT-455-3-E2FWT-ST	PYMT-455-3-E2FWT-ST	CP-1900-PYMT-455-3-E2FWT-ST_CGTACG_L008	FVB PyMT	455	Y	GSE124821-GPL17021
/datastore/nextgenout4/share/labs/bioinformatics/cmp_seq/mouse/rnaseq-output/150430_UNC12-SN629_0407_AC5HJ7ACXX_GATCAG_L007/458e0756-c786-4477-8e2e-4a9618b4a87d/Salmon_out/quant.sf	/datastore/nextgenout4/share/labs/bioinformatics/cmp_seq/mouse/rnaseq-output/150430_UNC12-SN629_0407_AC5HJ7ACXX_GATCAG_L007/458e0756-c786-4477-8e2e-4a9618b4a87d/Salmon_out/quant.sf	CP-1898	PYMT-628-3-E2FWT-ST	PYMT-628-3-E2FWT-ST	CP-1898-PYMT-628-3-E2FWT-ST_GTGGCC_L008	FVB PyMT	628	Y	GSE124821-GPL17021
/datastore/nextgenout4/share/labs/bioinformatics/cmp_seq/mouse/rnaseq-output/170714_UNC18-D00493_0431_ACB7RRANXX_ACAGTG_S24_L005/7e62c41a-9704-455c-bece-ec48708bdb1a/Salmon_out/quant.sf	/datastore/nextgenout4/share/labs/bioinformatics/cmp_seq/mouse/rnaseq-output/170714_UNC18-D00493_0431_ACB7RRANXX_ACAGTG_S24_L005/7e62c41a-9704-455c-bece-ec48708bdb1a/Salmon_out/quant.sf	CP-1896	PYMT-2139-4-E2FWT-ST	PYMT-2139-4-E2FWT-ST	CP-1896-PYMT-2139-4-E2FWT-ST_GTCCGC_S1_L001	FVB PyMT	2139	Y	GSE124821-GPL17021
/datastore/nextgenout4/share/labs/bioinformatics/cmp_seq/mouse/rnaseq-output/180427_UNC17-D00216_0527_ACCG6GANXX_GATCAG_S3_L001/c38c49b2-3ca8-4882-b2d4-89244f0efd61/Salmon_out/quant.sf	/datastore/nextgenout5/share/labs/bioinformatics/seqware/cmp_seq_temp_folder/mouse/rnaseq-output/180427_UNC17-D00216_0527_ACCG6GANXX_GATCAG_S3_L001/c38c49b2-3ca8-4882-b2d4-89244f0efd61/Salmon_out/quant.sf	CP-1897	PYMT-2680-1-E2FWT-ST	PYMT-2680-1-E2FWT-ST	CP-1897-PYMT-2680-1-E2FWT-ST_GTGAAA_S3_L001	FVB PyMT	2680	Y	GSE124821-GPL17021
/datastore/nextgenout4/share/labs/bioinformatics/cmp_seq/mouse/rnaseq-output/150501_UNC11-SN627_0398_AC5KENACXX_AGTTCC_L001/ef9e68f6-56e6-45c4-afdc-115eba4f142e/Salmon_out/quant.sf	/datastore/nextgenout4/share/labs/bioinformatics/cmp_seq/mouse/rnaseq-output/150501_UNC11-SN627_0398_AC5KENACXX_AGTTCC_L001/ef9e68f6-56e6-45c4-afdc-115eba4f142e/Salmon_out/quant.sf	CP-1899	PYMT-3136-5-E2FWT-ST	PYMT-3136-5-E2FWT-ST	CP-1899-PYMT-3136-5-E2FWT-ST_GTTTCG_L008	FVB PyMT	3136	Y	GSE124821-GPL17021
/datastore/nextgenout4/share/labs/bioinformatics/cmp_seq/mouse/rnaseq-output/150430_UNC12-SN629_0407_AC5HJ7ACXX_TAGCTT_L007/937a1f2c-3134-48fc-b465-fe19b72bd927/Salmon_out/quant.sf	/datastore/nextgenout4/share/labs/bioinformatics/cmp_seq/mouse/rnaseq-output/150430_UNC12-SN629_0407_AC5HJ7ACXX_TAGCTT_L007/937a1f2c-3134-48fc-b465-fe19b72bd927/Salmon_out/quant.sf		Erbb2deltaEx16_01-05	Erbb2deltaEx16_01-05		FVB rtTA-MMTV-Erbb2_delta16	5	Y	GSE139492
/datastore/nextgenout4/share/labs/bioinformatics/cmp_seq/mouse/rnaseq-output/150430_UNC12-SN629_0407_AC5HJ7ACXX_GGCTAC_L008/8187b8bb-5993-49fb-ac58-04a161fa57d5/Salmon_out/quant.sf	/datastore/nextgenout4/share/labs/bioinformatics/cmp_seq/mouse/rnaseq-output/150430_UNC12-SN629_0407_AC5HJ7ACXX_GGCTAC_L008/8187b8bb-5993-49fb-ac58-04a161fa57d5/Salmon_out/quant.sf		Erbb2deltaEx16_01-06	Erbb2deltaEx16_01-06		FVB rtTA-MMTV-Erbb2_delta16	6	Y	GSE139492
/datastore/nextgenout4/share/labs/bioinformatics/cmp_seq/mouse/rnaseq-output/150430_UNC12-SN629_0407_AC5HJ7ACXX_GTGAAA_L006/27e2a865-7731-42ce-8251-8d606d3ce9a2/Salmon_out/quant.sf	/datastore/nextgenout4/share/labs/bioinformatics/cmp_seq/mouse/rnaseq-output/150430_UNC12-SN629_0407_AC5HJ7ACXX_GTGAAA_L006/27e2a865-7731-42ce-8251-8d606d3ce9a2/Salmon_out/quant.sf		Erbb2deltaEx16_01-07	Erbb2deltaEx16_01-07		FVB rtTA-MMTV-Erbb2_delta16	7	Y	GSE139492
/datastore/nextgenout4/share/labs/bioinformatics/cmp_seq/mouse/rnaseq-output/180319_UNC17-D00216_0516_BCC8WFANXX_GTGGCC_S1_L001/dda6b80e-d6dd-481d-9b27-43ad9cfa142c/Salmon_out/quant.sf	/datastore/nextgenout5/share/labs/bioinformatics/seqware/cmp_seq_temp_folder/mouse/rnaseq-output/180319_UNC17-D00216_0516_BCC8WFANXX_GTGGCC_S1_L001/dda6b80e-d6dd-481d-9b27-43ad9cfa142c/Salmon_out/quant.sf		Erbb2deltaEx16_01-08	Erbb2deltaEx16_01-08		FVB rtTA-MMTV-Erbb2_delta16	8	Y	GSE139492
/datastore/nextgenout4/share/labs/bioinformatics/cmp_seq/mouse/rnaseq-output/140624_UNC12-SN629_0375_AC4K57ACXX_CTTGTA_L001/17a79358-7a44-4801-a512-dbec718b9e02/Salmon_out/quant.sf	/datastore/nextgenout4/share/labs/bioinformatics/cmp_seq/mouse/rnaseq-output/140624_UNC12-SN629_0375_AC4K57ACXX_CTTGTA_L001/17a79358-7a44-4801-a512-dbec718b9e02/Salmon_out/quant.sf		Erbb2deltaEx16_01-09	Erbb2deltaEx16_01-09		FVB rtTA-MMTV-Erbb2_delta16	9	Y	GSE139492
/datastore/nextgenout4/share/labs/bioinformatics/cmp_seq/mouse/rnaseq-output/140624_UNC12-SN629_0375_AC4K57ACXX_ACAGTG_L002/a7fdb0dd-2ad3-426d-8cf9-69354d2dd8d2/Salmon_out/quant.sf	/datastore/nextgenout4/share/labs/bioinformatics/cmp_seq/mouse/rnaseq-output/140624_UNC12-SN629_0375_AC4K57ACXX_ACAGTG_L002/a7fdb0dd-2ad3-426d-8cf9-69354d2dd8d2/Salmon_out/quant.sf		Erbb2deltaEx16_01-10	Erbb2deltaEx16_01-10		FVB rtTA-MMTV-Erbb2_delta16	10	Y	GSE139492
/datastore/nextgenout4/share/labs/bioinformatics/cmp_seq/mouse/rnaseq-output/140624_UNC12-SN629_0375_AC4K57ACXX_GTGAAA_L002/67736bab-4ed9-41cd-847e-0f5c062fde8e/Salmon_out/quant.sf	/datastore/nextgenout4/share/labs/bioinformatics/cmp_seq/mouse/rnaseq-output/140624_UNC12-SN629_0375_AC4K57ACXX_GTGAAA_L002/67736bab-4ed9-41cd-847e-0f5c062fde8e/Salmon_out/quant.sf		Erbb2deltaEx16_01-11	Erbb2deltaEx16_01-11		FVB rtTA-MMTV-Erbb2_delta16	11	Y	GSE139492
/datastore/nextgenout4/share/labs/bioinformatics/cmp_seq/mouse/rnaseq-output/141208_UNC16-SN851_0493_BHBBEGADXX_GTGAAA_L001/d588f48b-8ff6-41d4-b34d-5e380c41c91d/Salmon_out/quant.sf	/datastore/nextgenout4/share/labs/bioinformatics/cmp_seq/mouse/rnaseq-output/141208_UNC16-SN851_0493_BHBBEGADXX_GTGAAA_L001/d588f48b-8ff6-41d4-b34d-5e380c41c91d/Salmon_out/quant.sf		Erbb2deltaEx16_01-12	Erbb2deltaEx16_01-12		FVB rtTA-MMTV-Erbb2_delta16	12	Y	GSE139492
/datastore/nextgenout4/share/labs/bioinformatics/cmp_seq/mouse/rnaseq-output/141208_UNC16-SN851_0493_BHBBEGADXX_CTTGTA_L001/847aef03-3175-4359-a277-6d798b3916f4/Salmon_out/quant.sf	/datastore/nextgenout4/share/labs/bioinformatics/cmp_seq/mouse/rnaseq-output/141208_UNC16-SN851_0493_BHBBEGADXX_CTTGTA_L001/847aef03-3175-4359-a277-6d798b3916f4/Salmon_out/quant.sf		Erbb2deltaEx16_01-13	Erbb2deltaEx16_01-13		FVB rtTA-MMTV-Erbb2_delta16	13	Y	GSE139492
/datastore/nextgenout4/share/labs/bioinformatics/cmp_seq/mouse/rnaseq-output/141208_UNC16-SN851_0493_BHBBEGADXX_CAGATC_L002/6ee62dfe-4c6e-4ea3-b76d-c4f6e7c18d49/Salmon_out/quant.sf	/datastore/nextgenout4/share/labs/bioinformatics/cmp_seq/mouse/rnaseq-output/141208_UNC16-SN851_0493_BHBBEGADXX_CAGATC_L002/6ee62dfe-4c6e-4ea3-b76d-c4f6e7c18d49/Salmon_out/quant.sf		Erbb2deltaEx16_01-14	Erbb2deltaEx16_01-14		FVB rtTA-MMTV-Erbb2_delta16	14	Y	GSE139492
/datastore/nextgenout4/share/labs/bioinformatics/cmp_seq/mouse/rnaseq-output/141210_UNC11-SN627_0391_AC5FVDACXX_AGTCAA_L001/03a4969e-e091-4af8-a1fc-eff95f5f402e/Salmon_out/quant.sf	/datastore/nextgenout4/share/labs/bioinformatics/cmp_seq/mouse/rnaseq-output/141210_UNC11-SN627_0391_AC5FVDACXX_AGTCAA_L001/03a4969e-e091-4af8-a1fc-eff95f5f402e/Salmon_out/quant.sf		Erbb2deltaEx16_01-15	Erbb2deltaEx16_01-15		FVB rtTA-MMTV-Erbb2_delta16	15	Y	GSE139492
/datastore/nextgenout4/share/labs/bioinformatics/cmp_seq/mouse/rnaseq-output/141208_UNC16-SN851_0493_BHBBEGADXX_ACAGTG_L002/da825475-f053-42d3-baa0-59abb9df695e/Salmon_out/quant.sf	/datastore/nextgenout4/share/labs/bioinformatics/cmp_seq/mouse/rnaseq-output/141208_UNC16-SN851_0493_BHBBEGADXX_ACAGTG_L002/da825475-f053-42d3-baa0-59abb9df695e/Salmon_out/quant.sf		Erbb2deltaEx16_01-16	Erbb2deltaEx16_01-16		FVB rtTA-MMTV-Erbb2_delta16	16	Y	GSE139492
/datastore/nextgenout4/share/labs/bioinformatics/cmp_seq/mouse/rnaseq-output/141210_UNC11-SN627_0391_AC5FVDACXX_CGATGT_L002/14a3c182-b8b9-46c3-8bc2-4545891cb961/Salmon_out/quant.sf	/datastore/nextgenout4/share/labs/bioinformatics/cmp_seq/mouse/rnaseq-output/141210_UNC11-SN627_0391_AC5FVDACXX_CGATGT_L002/14a3c182-b8b9-46c3-8bc2-4545891cb961/Salmon_out/quant.sf		Erbb2deltaEx16_01-17	Erbb2deltaEx16_01-17		FVB rtTA-MMTV-Erbb2_delta16	17	Y	GSE139492
/datastore/nextgenout4/share/labs/bioinformatics/cmp_seq/mouse/rnaseq-output/141210_UNC11-SN627_0391_AC5FVDACXX_TGACCA_L002/a42a7aa1-fffd-4ef0-a695-7a729ce4030a/Salmon_out/quant.sf	/datastore/nextgenout4/share/labs/bioinformatics/cmp_seq/mouse/rnaseq-output/141210_UNC11-SN627_0391_AC5FVDACXX_TGACCA_L002/a42a7aa1-fffd-4ef0-a695-7a729ce4030a/Salmon_out/quant.sf		Erbb2deltaEx16_01-18	Erbb2deltaEx16_01-18		FVB rtTA-MMTV-Erbb2_delta16	18	Y	GSE139492
/datastore/nextgenout5/share/labs/bioinformatics/seqware/chollet_starsalmon_4_2_19/rnaseq-output/18046XD-01-05_S1_L004/85dff512-4100-42df-b5fc-cacdcee26585/Salmon_out/quant.sf	/datastore/nextgenout5/share/labs/bioinformatics/seqware/chollet_starsalmon_4_2_19/rnaseq-output/18046XD-01-05_S1_L004/85dff512-4100-42df-b5fc-cacdcee26585/Salmon_out/quant.sf		Erbb2deltaEx16_01-19	Erbb2deltaEx16_01-19		FVB rtTA-MMTV-Erbb2_delta16	19	Y	GSE139492
/datastore/nextgenout5/share/labs/bioinformatics/seqware/chollet_starsalmon_4_2_19/rnaseq-output/18046XD-01-06_S1_L004/ec39a082-4aa5-4d3a-8cfe-be2a1149f08d/Salmon_out/quant.sf	/datastore/nextgenout5/share/labs/bioinformatics/seqware/chollet_starsalmon_4_2_19/rnaseq-output/18046XD-01-06_S1_L004/ec39a082-4aa5-4d3a-8cfe-be2a1149f08d/Salmon_out/quant.sf		Erbb2deltaEx16_01-20	Erbb2deltaEx16_01-20		FVB rtTA-MMTV-Erbb2_delta16	20	Y	GSE139492
/datastore/nextgenout5/share/labs/bioinformatics/seqware/chollet_starsalmon_4_2_19/rnaseq-output/18046XD-01-07_S1_L004/f948615b-0d0c-4023-a46b-8d60bba5cea4/Salmon_out/quant.sf	/datastore/nextgenout5/share/labs/bioinformatics/seqware/chollet_starsalmon_4_2_19/rnaseq-output/18046XD-01-07_S1_L004/f948615b-0d0c-4023-a46b-8d60bba5cea4/Salmon_out/quant.sf	CP-1948	FVB4-pooledMAMM	FVB4-pooledMAMM	CP-1948-FVB4-pooledMAMM_GTCCGC_S1_L001	FVB wt	pooled	Y	GSE124821-GPL17021
/datastore/nextgenout5/share/labs/bioinformatics/seqware/chollet_starsalmon_4_2_19/rnaseq-output/18046XD-01-08_S1_L004/916d2717-450c-4258-b7fc-364af3dfd2ee/Salmon_out/quant.sf	/datastore/nextgenout5/share/labs/bioinformatics/seqware/chollet_starsalmon_4_2_19/rnaseq-output/18046XD-01-08_S1_L004/916d2717-450c-4258-b7fc-364af3dfd2ee/Salmon_out/quant.sf	CP-1949	FVB5-pooledMAMM	FVB5-pooledMAMM	CP-1949-FVB5-pooledMAMM_GAGTGG_S3_L001	FVB wt	pooled	Y	GSE124821-GPL17021
/datastore/nextgenout5/share/labs/bioinformatics/seqware/chollet_starsalmon_4_2_19/rnaseq-output/18046XD-01-09_S1_L005/cb3c04e1-92e4-452f-80af-90afa98611cc/Salmon_out/quant.sf	/datastore/nextgenout5/share/labs/bioinformatics/seqware/chollet_starsalmon_4_2_19/rnaseq-output/18046XD-01-09_S1_L005/cb3c04e1-92e4-452f-80af-90afa98611cc/Salmon_out/quant.sf	CP-1676	FVB Mammary 1	FVB Mammary 1	CP-1676|FVB Mammary 1|C9T7VANXX_GTCCGC_136697_S8_L003	FVB wt		Y	GSE124821-GPL17021
/datastore/nextgenout5/share/labs/bioinformatics/seqware/chollet_starsalmon_4_2_19/rnaseq-output/18046XD-01-10_S1_L005/62f0e7db-dda9-4528-bd44-38b1eda98300/Salmon_out/quant.sf	/datastore/nextgenout5/share/labs/bioinformatics/seqware/chollet_starsalmon_4_2_19/rnaseq-output/18046XD-01-10_S1_L005/62f0e7db-dda9-4528-bd44-38b1eda98300/Salmon_out/quant.sf	CP-1677	FVB Mammary 2	FVB Mammary 2	CP-1677|FVB Mammary 2|C9T7VANXX_GTGAAA_136698_S9_L003	FVB wt		Y	GSE124821-GPL17021
/datastore/nextgenout5/share/labs/bioinformatics/seqware/chollet_starsalmon_4_2_19/rnaseq-output/18046XD-01-11_S1_L005/5220b9cd-ec7f-4cd5-bd9d-956c84a9b0f2/Salmon_out/quant.sf	/datastore/nextgenout5/share/labs/bioinformatics/seqware/chollet_starsalmon_4_2_19/rnaseq-output/18046XD-01-11_S1_L005/5220b9cd-ec7f-4cd5-bd9d-956c84a9b0f2/Salmon_out/quant.sf	CP-1915	B4513-5R-ILC-ST	B4513-5R-ILC-ST	CP-1915-B4513-5R-ILC-ST_CTTGTA_L003	ILC-Pik3Ca/Cdh1Null	B4513	Y	GSE124821-GPL17021
/datastore/nextgenout5/share/labs/bioinformatics/seqware/chollet_starsalmon_4_2_19/rnaseq-output/18046XD-01-12_S1_L005/343a084d-3e68-4027-a064-5f1c46838f33/Salmon_out/quant.sf	/datastore/nextgenout5/share/labs/bioinformatics/seqware/chollet_starsalmon_4_2_19/rnaseq-output/18046XD-01-12_S1_L005/343a084d-3e68-4027-a064-5f1c46838f33/Salmon_out/quant.sf	CP-1908	B4532-4R-ILC-ST	B4532-4R-ILC-ST	CP-1908-B4532-4R-ILC-ST_ACAGTG_L005	ILC-Pik3Ca/Cdh1Null	B4532	Y	GSE124821-GPL17021
/datastore/nextgenout5/share/labs/bioinformatics/seqware/chollet_starsalmon_4_2_19/rnaseq-output/18046XD-01-13_S1_L006/82eaa36f-801f-42a4-a76c-d0abd7633562/Salmon_out/quant.sf	/datastore/nextgenout5/share/labs/bioinformatics/seqware/chollet_starsalmon_4_2_19/rnaseq-output/18046XD-01-13_S1_L006/82eaa36f-801f-42a4-a76c-d0abd7633562/Salmon_out/quant.sf	CP-1912	B4535-1R-ILC-ST	B4535-1R-ILC-ST	CP-1912-B4535-1R-ILC-ST_GATCAG_L004	ILC-Pik3Ca/Cdh1Null	B4535	Y	GSE124821-GPL17021
/datastore/nextgenout5/share/labs/bioinformatics/seqware/chollet_starsalmon_4_2_19/rnaseq-output/18046XD-01-14_S1_L006/024fa377-9cbd-4aab-b2e5-796ac129c088/Salmon_out/quant.sf	/datastore/nextgenout5/share/labs/bioinformatics/seqware/chollet_starsalmon_4_2_19/rnaseq-output/18046XD-01-14_S1_L006/024fa377-9cbd-4aab-b2e5-796ac129c088/Salmon_out/quant.sf	CP-1909	B4538-3L-ILC-ST	B4538-3L-ILC-ST	CP-1909-B4538-3L-ILC-ST_GCCAAT_L005	ILC-Pik3Ca/Cdh1Null	B4538	Y	GSE124821-GPL17021
/datastore/nextgenout5/share/labs/bioinformatics/seqware/chollet_starsalmon_4_2_19/rnaseq-output/18046XD-01-15_S1_L006/a28fa179-82c5-4176-932e-511f2d694667/Salmon_out/quant.sf	/datastore/nextgenout5/share/labs/bioinformatics/seqware/chollet_starsalmon_4_2_19/rnaseq-output/18046XD-01-15_S1_L006/a28fa179-82c5-4176-932e-511f2d694667/Salmon_out/quant.sf	CP-1910	B4540-5L-ILC-ST	B4540-5L-ILC-ST	CP-1910-B4540-5L-ILC-ST_CAGATC_L004	ILC-Pik3Ca/Cdh1Null	B4540	Y	GSE124821-GPL17021
/datastore/nextgenout5/share/labs/bioinformatics/seqware/chollet_starsalmon_4_2_19/rnaseq-output/18046XD-01-16_S0_L001/051e5f82-4b3e-4469-80f1-2d9324d49d2e/Salmon_out/quant.sf	/datastore/nextgenout5/share/labs/bioinformatics/seqware/chollet_starsalmon_4_2_19/rnaseq-output/18046XD-01-16_S0_L001/051e5f82-4b3e-4469-80f1-2d9324d49d2e/Salmon_out/quant.sf	CP-1911	B4589-3L-ILC-ST	B4589-3L-ILC-ST	CP-1911-B4589-3L-ILC-ST_ACTTGA_L004	ILC-Pik3Ca/Cdh1Null	B4589	Y	GSE124821-GPL17021
/datastore/nextgenout5/share/labs/bioinformatics/seqware/chollet_starsalmon_4_2_19/rnaseq-output/18046XD-01-17_S0_L001/0d13be62-e99f-40a1-bfe4-b0ad980ad51b/Salmon_out/quant.sf	/datastore/nextgenout5/share/labs/bioinformatics/seqware/chollet_starsalmon_4_2_19/rnaseq-output/18046XD-01-17_S0_L001/0d13be62-e99f-40a1-bfe4-b0ad980ad51b/Salmon_out/quant.sf	CP-1913	B4657-5L-ILC-ST	B4657-5L-ILC-ST	CP-1913-B4657-5L-ILC-ST_TAGCTT_L003	ILC-Pik3Ca/Cdh1Null	B4657	Y	GSE124821-GPL17021
/datastore/nextgenout5/share/labs/bioinformatics/seqware/chollet_starsalmon_4_2_19/rnaseq-output/18046XD-01-18_S1_L006/9a087cd3-8f4e-4a91-b34b-0e545a72baf0/Salmon_out/quant.sf	/datastore/nextgenout5/share/labs/bioinformatics/seqware/chollet_starsalmon_4_2_19/rnaseq-output/18046XD-01-18_S1_L006/9a087cd3-8f4e-4a91-b34b-0e545a72baf0/Salmon_out/quant.sf	CP-1914	B4713-5L-ILC-ST	B4713-5L-ILC-ST	CP-1914-B4713-5L-ILC-ST_GGCTAC_L003	ILC-Pik3Ca/Cdh1Null	B4713	Y	GSE124821-GPL17021
/datastore/nextgenout5/share/labs/bioinformatics/seqware/chollet_starsalmon_4_2_19/rnaseq-output/18046XD-01-19_S1_L006/5e1b8b22-8782-4236-8562-30575aa3d236/Salmon_out/quant.sf	/datastore/nextgenout5/share/labs/bioinformatics/seqware/chollet_starsalmon_4_2_19/rnaseq-output/18046XD-01-19_S1_L006/5e1b8b22-8782-4236-8562-30575aa3d236/Salmon_out/quant.sf	CP-1916	B4894-5L-ILC-ST	B4894-5L-ILC-ST	CP-1916-B4894-5L-ILC-ST_AGTCAA_L002	ILC-Pik3Ca/Cdh1Null	B4894	Y	GSE124821-GPL17021
/datastore/nextgenout5/share/labs/bioinformatics/seqware/chollet_starsalmon_4_2_19/rnaseq-output/18046XD-01-20_S00_L001/b476d85e-c8f2-40dc-85c5-24ce4142d45d/Salmon_out/quant.sf	/datastore/nextgenout5/share/labs/bioinformatics/seqware/chollet_starsalmon_4_2_19/rnaseq-output/18046XD-01-20_S00_L001/b476d85e-c8f2-40dc-85c5-24ce4142d45d/Salmon_out/quant.sf	CP-1917	B4894-5R-ILC-ST	B4894-5R-ILC-ST	CP-1917-B4894-5R-ILC-ST_AGTTCC_L002	ILC-Pik3Ca/Cdh1Null	B4898	Y	GSE124821-GPL17021

## Sheet: S1B
Supplementary Table 1B: Summary of predicted neoepitope peptides in FVB-rtTA-HER2Δ16 spontaneous tumors and non-mutated GFP/HER2 control peptides
Variant peptide amino acid sequence	Reference peptide amino acid sequence	Gene identification	Included in indicated peptide vaccine
DEELSCTV	DEELSCSV	Serpina3m	**
TQAKFRRLL	TQAKLRRLL	Tgfbrap1
TETQAKFRRLL	TETQAKLRRLL	Tgfbrap1	**
DEELSCSVV	DEELSCSVL	Serpina3m
VENTASAI	GENTASAI	Focad	**
DEELSCTVV	DEELSCSVL	Serpina3m
SGENLMTFTV	AGENLMTFTV	Rassf6	**
EELSCSVV	EELSCSVL	Serpina3m
TETQAKFRRL	TETQAKLRRL	Tgfbrap1
VELALVVAI	VELALVVAM	Krt5
EELSCTVV	EELSCSVL	Serpina3m
EEMPYLKCPF	EEMPYLKCPL	Pfkfb3
LSGENLMTFTV	LAGENLMTFTV	Rassf6
LENGCCVI	LENGCYVI	Il33
ATETQAKFRRL	ATETQAKLRRL	Tgfbrap1
TQAKFRRL	TQAKLRRL	Tgfbrap1
FRDEELSCTVV	FRDEELSCSVL	Serpina3m
FRDEELSCSVV	FRDEELSCSVL	Serpina3m
EELTQDMELV	EELIQDMELV	H2-K1
WSWLWWWLL	WSWLWWWLW	Krt5
SGENLMTFTVS	AGENLMTFTVS	Rassf6
AEEMPYLKCPF	AEEMPYLKCPL	Pfkfb3
MEGSPNLI	MEGSPHLI	Nr2c1
DEELSCSVVEL	DEELSCSVLEL	Serpina3m
	NEKRDHMVLLEFV	GFP (217-229)	**
	FEGDTLVNRI	GFP (119-128)	**
	EELFTGVV	GFP (10-17)	**
	DNYALAVL	HER2 (110-117)	**
	EQLQVFETL	HER2 (395-403	**
	DECVGEGL	HER2 (502-509)	**

## Sheet: S1C
Table S1C. List of gene signatures with sources. Genes within these gene-sets were converted from human to corresponding homologous murine genes.
Citation	Azizi et al	Rooney et al	Azizi et al	Azizi et al	Ayers et al	R-HSA-983170	R-HSA-2132295
Pathway	Anergy	Co-inhibition	Proinflammatory	Type I Interferon	IFN-g signature	Antigen Presentation: Folding, assembly and peptide loading of class I MHC	MHC class II antigen presentation
	EGR3	BTLA	IL1A	IRF1	IDO1	TAP1	CD74
	NR4A3	C10orf54	IL1B	IFIH1	CXCL10	TAP2	AP1S3
	EGR1	CD160	TNF	IFITM3	CXCL9	HSPA5	DNM3
	NR4A2	CD244	IFNG	DDX58	HLA-DRA	HLA-C	AP1M2
	EGR2	CD274	TBX21	IFI44L	STAT1	HLA-B	SEC24B
	TNFSF11	CTLA4	CCL3	IFI6	IFNg	HLA-A	CTSF
	IRF4	HAVCR2	CCL4	IFITM2		HLA-G	CLTC
	GCH1	LAG3	PRF1	NAMPT		HLA-F	LAG3
	GADD45B	LAIR1	GZMA	OASL		HLA-E	AP1M1
	NFATC1	LGALS9	GZMB	RTP4		B2M	DNM1
	JARID2	PDCD1LG2	GZMK	TREX1		HLA-H	AP1S1
	SLC29A3	PVRL3	GZMH	ADAR		CANX	AP1S2
	HLF	TIGIT	CD8A	FAM46C		SEC23A	DNM2
	ZFP36L1		FASLG	LY6E		SEC31A	AP2B1
	RNF19A		CCL2	MCOLN2		SEC13	SEC31A
	ADORA2B		CCL20	APOBEC3G		PDIA3	SH3GL2
	CCRN41		IL2	IL15		SEC24D	HLA-DRA
	DUSP6		IL6	ISG15		SEC24A	SEC23A
	NDRG1		IL12a	MX1		SEC24C	ARF1
	ADORA2A		IL17a	TLR3		SEC24B	CTSA
	HSPA1A		IL23a			SAR1B	AP2M1
	PFKP		PTGS2			CALR	CTSC
	FYN		TLR4			TAPBP	HLA-DQB1
	CTSE		TNF			FAM20B	CANX
	ZFP629						HLA-DQB2
	F2R						AP1B1
	RNF128						CTSB
	LAG3						CTSH
	RGS16						HLA-DPB1
	E2F1						MIR3620
	E2F2						CTSK
							CTSL
							CTSO
							HLA-DRB3
							SEC13
							HLA-DRB1
							CTSD
							CTSE
							HLA-DRB4
							HLA-DRB5
							SEC24D
							CLTA
							SEC24A
							IFI30
							SEC24C
							AP2A2
							SAR1B
							CTSS
							CTSV
							LGMN
							AP2S1
							AP1G1
							HLA-DOA
							HLA-DOB
							HLA-DPA1
							AP2A1
							HLA-DMB
							HLA-DQA1
							HLA-DQA2
							HLA-DMA

## Sheet: S1D
Table S1D. List of top 50 genes associated with activation and exhaustion signatures (Tnf or Havcr2)
Activation Gene signature	Exhaustion Gene Signature
Tnf	Havcr2
Ccl3	Lag3
Ccl4	Cxcr6
S100a4	Itgav
Cd69	Tnfrsf9
Dusp2	AW112010
AW112010	Srxn1
Bhlhe40	Capg
Fosb	Cd200
Tbx21	Adgrg1
Nfkbid	Ccl3
S100a6	Cst7
Adora2b	Pvrig
Gadd45b	Ccdc80
Ifitm3	Slc37a2
Nkg7	Zbtb32
Hspa1a	Entpd1
Ctsw	Adam8
Hspa1b	Pdcd1
Nfkbia	Tigit
Nr4a1	S100a6
Atf3	Neb
Cxcr6	Runx2
Fasl	Ctsb
Ifng	Maf
Csf1	Il2rb
Klrd1	CAAA01147332.1
Capg	Rgs1
Ctla2a	Csf1
Plk3	Ccl5
Dusp1	Eea1
Ly6e	Ccr8
Phf11b	Ctla4
Gbp9	Socs2
Ifi202b	Cdkn2a
Klrk1	Tspan2
Ier3	Tnfsf10
Ltb4r1	Ncaph
Vim	Cib2
Adam19	Ikzf2
Ccr8	Nkg7
Abr	Spats2
Thy1	S100a11
Pmaip1	Klrd1
Lgals1	Lgals1
Bcl2a1a	Prf1
Cxcl2	Cx3cr1
Ccrl2	Mcm6
Egr1	Fam20a
Id2	Adam19

## Sheet: S1E
Table S1E. List of TCR alpha and beta gene sequences for top expanded clones
Sample	Chain	Reference sequence	Consensus sequences from clones
Vaccine alone 2	alpha	Vacin	CTCTTTTCTAGTTGACAACTTAGAGTTGAGGATCTCAGTCCTCAGTGAAGAGGAAGGAGGAGAGAATGAAATCCTTGAGTGTTTCCCTAGTGGTCCTGTGGCTCCTGTTAAACTGGGTGAACAGCCAGCAGAATGTGCAGCAGAGCCCAGAATCCCTCATTGTCCCAGAGGGAGCCAGGACCTCTCTCAACTGCACTTTCAGTGACAGTGCTTCTCAGTATTTCTGGTGGTACAGACAGCATTCTGGGAAAGCCCCCAAGGCACTGATGTCCATCTTCTCCAATGGTGAAAAAGAAGAAGGGAGATTCACAATTCACCTCAATAAAGCCAGTCTGCATTTCTCCCTGCACATCAGAGACTCCCAGCCCAGTGACTCTGCTCTCTATCTCTGTGCAGTGA…
668	beta	TTTCGTACTTCTAAGCCACCATGGCTACAAGGCTCCTCTGTTACACAGTACTTTGTCTCCTGGGTGCAAGAATTTTGAATTCAAAAGTCATTCAGACTCCAAGATATCTGGTGAAAGGGCAAGGACAAAAAGCAAAGATGAGGTGTATCCCTGAAAAGGGACATCCAGTTGTATTCTGGTATCAACAAAATAAGAACAATGAGTTTAAATTTTTGATTAACTTTCAGAATCAAGAAGTTCTTCAGCAAATAGACATGACTGAAAAACGATTCTCTGCTGAGTGTCCTTCAAACTCACCTTGCAGCCTAGAAATTCAGTCCTCTGAGGCAGGAGACTCAGCACTGTACCTCTGTGCCAGCAGTCTGTCTAACTATGCTGAGCAGTTCTTCGGACCAGGGA…	TTTCGTACTTCTAAGCCACCATGGCTACAAGGCTCCTCTGTTACACAGTACTTTGTCTCCTGGGTGCAAGAATTTTGAATTCAAAAGTCATTCAGACTCCAAGATATCTGGTGAAAGGGCAAGGACAAAAAGCAAAGATGAGGTGTATCCCTGAAAAGGGACATCCATTTGTATTCTGGTATCAACAAAATAAGAACAATGAGTTTAAATTTTTGATTAATTTTCAGAATCAAGAAGTTCTTCAGCAAATAGACATGACTGAAAAACGATTCTCTGCTGAGTGTCCTTCAAACTCACCTTGCAGCCTAGAAATTCAGTCCTCTGAGGCAGGAGACTCAGCACTGTACCTCTGTGCCAGCAGTCTGGGGGGGGGCTATGCTGAGCAGTTCTTCGGACCAG…
Vaccine + aPD1 1	alpha	CTCTTTTCTAGCTGCCAACTTAGAGTTGAGGATCTCAGTCCTCAGTGAAGAGGAAGGAAGAGAGAATGAAATCCTTGAGTGTTTCCCTAGTGGTCCTGTGGCTCCAGTTAAACTGGGTGAACAGCCAGCAGAAGGTGCAGCAGAGCCCAGAATCCCTCATTGTCCCAGAGGGAGCCATGACCTCTCTCAACTGCACTTTCAGCGACAGTGCTTCTCAGTATTTTGCATGGTACAGACAGCATTCTGGGAAAGCCCCCAAGGCACTGATGTCCATCTTCTCCAATGGTGAAAAAGAAGAAGGCAGATTCACAATTCACCTCAATAAAGCCAGTCTGCATTTCTCCCTGCACATCAGAGACTCCCAGCCCAGTGACTCTGCTCTCTACCTCTGTGCAGTGA…	TGGGGGAAAAAGGGTACCGGAAGAGGAGGAGGGGGTAGAGAAAGGGCTGGGGGAAGGCTTGGTGCTGCTGGGGTCATGAAGAGTCTCTTTTCTAGTTGACAACTTAGAGTTGAGGATCTCAGTCCTCAGTGAAGAGGAAGGAGGAGAGAATGAAATCCTTGAGTGTTTCCCTAGTGGTCCTGTGGCTCCTGTTAAACTGGGTGAACAGCCAGCAGAATGTGCAGCAGAGCCCAGAATCCCTCATTGTCCCAGAGGGAGCCAGGACCTCTCTCAACTGCACTTTCAGTGACAGTGCTTCTCAGTATTTCTGGTGGTACAGACAGCATTCTGGGAAAGCCCCCAAGGCACTGATGTCCATCTTCTCCAATGGTGAAAAAGAAGAAGGGAGATTCACAATTC…
471	beta	GGAGGGGCCTGTGCATCTCTGGCTTAGAAAAGGAAGTACAAGTGCAGAGTAGACAAGCCTAGACAAAGACCATCTTGAACTATGCTGTACTCTCTCCTTGCCTTTCTCCTGGGCATGTTCTTGGGTGTTAGTGCTCAGACTATCCATCAATGGCCAGTTGCCGAGATCAAGGCTGTGGGCAGCCCACTGTCTCTGGGGTGTACCATAAAGGGGAAATCAAGCCCTAACCTCTACTGGTACTGGCAGGCCACAGGAGGCACCCTCCAGCAACTCTTCTACTCTATTACTGTTGGCCAGGTAGAGTCGGTGGTGCAACTGAACCTCTCAGCTTCCAGGCCGAAGGACGACCAATTCATCCTAAGCACGGAGAAGCTGCTTCTCAGCCACTCTGGCTTCTAC…	AGTTGGGAGCTAGTAATGAAGGGGGCGTAACTCATTATTATTTCTTATATGGGAGTCTTGAGGTAGGAGGGGCCTGTGCATCTCTGGCTTAGAAAAGGAAGTACAAGTGCAGAGTAGACAAGCCTAGACAAAGACCATCTTGAACTATGCTGTACTCTCTCCTTGCCTTTCTCCTGGGCATGTTCTTGGGTGTTAGTGCTCAGACTATCCATCAATGGCCAGTTGCCGAGATCAAGGCTGTGGGCAGCCCACTGTCTCTGGGGTGTACCATAAAGGGGAAATCAAGCCCTAACCTCTACTGGTACTGGCAGGCCACAGGAGGCACCCTCCAGCAACTCTTCTACTCTATTACTGTTGGCCAGGTAGAGTCGGTGGTGCAACTGAACCTCTCAGCTTCCA…
Vaccine alone 1	alpha	ATGAAGTCCTTGTGTGTTTCACTAGTGGTCCTGTGGCTTCAGCTACACTGGGTGAACAGCCAGCAGAAGGTGCAGCAGAGCCCAGAATCCCTCATTGTTCCAGAGGGAGGCATGGCCTCTCTCAACTGCACTTTCAGTGATCGTAATTCTCAGTATTTCTGGTGGTACAGACAGCATTCTGGGGAAGGCCCCAAGGCACTGATGTCCATCTTCTCCAATGGTGACAAGAAGGAAGGCAGATTCACAGCTCACCTCAATAAGGCCAGCCTGCATGTATCCCTGCACATCAAAGACTCCCAACCCAGTGACTCTGCTCTCTACTTCTGTGCAGTGAGCATGTTATCTGGTAGCTTCAATAAGTTGACCTTTGGAGCAGGGACCAGACTGGCTGTGTGCCCA…	TGGGGGAGAAGGAAGGAAGAGGGCTGGGCAGGAAGAAGGGGGGGGGGGTAGAGAAAGGGCTGGAGGAAAAGCTTGGTGCTGTTTAGATGGTGAAGCGTCACGTTTCTGATTGCTAGCAAAGTTGCTTTTCATGTTTCCTATAGGAGATGTGAAAACTTACGAATACGACTATATGAGAATTTAGGGTTTAGGGTTGAGAATCTGAATCCTCAGTGAAGAGGGAAGAGGAAAGAATGAAGTCCTTGTGTGTTTCACTAGTGGTCCTGTGGCTTCAGCTACACTGGGTGAACAGCCAGCAGAAGGTGCAGCAGAGCCCAGAATCCCTCATTGTTCCAGAGGGAGGCATGGCCTCTCTCAACTGCACTTTCAGTGATCGTAATTCTCAGTATTTCTGGTGGT…
402.1	beta	ATGAGAGTTAGGCTCATCTCTGCTGTGGTGCTGTGTTTCCTAGGAACAGGCCTTGTGGACATGAAAGTAACCCAGATGCCAAGATACCTGATCAAAAGAATGGGAGAGAATGTTTTGCTGGAATGTGGACAGGACATGAGCCATGAAACAATGTACTGGTATCGACAAGACCCTGGTCTGGGGCTACAGCTGATTTATATCTCATACGATGTTGATAGTAACAGCGAAGGAGACATCCCTAAAGGATACAGGGTCTCACGGAAGAAGCGGGAGCATTTCTCCCTGATTCTGGATTCTGCTAAAACAAACCAGACATCTGTGTACTTCTGTGCTAGCAGTTTATCGGGACAGGGGGCTAACTATGCTGAGCAGTTCTTCGGACCAGGGACACGACTCACC…	ACTGTCCCCATCAGCCCTTTTGTCAAACTTTTAAATGATATTTACACCATTGCTGTCACCACCACCAATGGAACATAAAGAAAACAAATATTTTGGTGAGAGGAATTAGCTAATTGCATATTAAAAGACATCAATGAAAATTGCCTCTATCTATGGATTCAGAATGGCAAAAATTGGAAGTATCTAAAAATGAATACTTTCAGAAGACTAAACTGGTGAGCTCCCAGACACACACAGTATCATTCCATATACATGTACGTAAAAGTGCACATACACAGAGATACTTCCATGATAACCTCTTTCTTCTCTTGACACCTCCACATGTTTTAATCTACATGCAGGAAGAGAGTCATGGGTGTAGTCAAAGACAGTGACATCATAAGCACTCAATATAGAGCA…
Vaccine + aPD1 2	alpha	AGCAAAGCTGCTTTTTATGTTTCCTATAGGAGATGTGAAAACTTATGAACACAACTATATGAGTTTAGGATTGAGAATCTAAATCCACAGCGAAGAGGGAAGAGGAGAGAATGAAATCCTTGAGTGTTTCACTAGTGGTCCTGTGGCTCCAGTTAAACTGCGTGAGGAGCCAGCAGAAGGTGCAGCAGAGCCCAGAATCCCTCAGTGTCCCAGAGGGAGGCATGGCCTCTCTCAACTGCACTTCAAGTGATCGTAATTTTCAGTACTTCTGGTGGTACAGACAGCATTCTGGAGAAGGCCCCAAGGCACTGATGTCAATCTTCTCTGATGGTGACAAGAAAGAAGGCAGATTCACAGCTCACCTCAATAAGGCCAGCCTGCATGTTTCCCTGCACATCA…	GGGGAGGAAGAGGAGGGGGGAGTAGACAGAGAGCTGGAGGAAAGGCTTGCTGCTGTTTAGATGGTGAAGAGTCACTGTTGTGATTGCTAGCAAAGCTGCTTTTTATGTTTCCTATAGGAGATGTGAAAACTTATGAACACAACTATATGAGTTTAGGATTGAGAATCTAAATCCACAGTGAAGAGGGAAGAGGAGAGAATGAAATCCTTGAGTGTTTCACTAGTGGTCCTGTGGCTCCAGGTAAACTGCGTGAGGAGCCAGCAGAAGGTGCAGCAGAGCCCAGAATCCCTCAGTGTCCCAGAGGGAGGCATGGCCTCTTTCAACTGCACTTCAAGTGATCGTAATTTTCAGTACTTCTGGTGGTACAGACAGCATTCTGGAGAAGGCCCCAAGGCACTG…
463	beta	GGAGGGGCCTGTGCATCTCTGGCTTAGAAAAGGAAGTACAAGTGCAGAGTAGACAAGCCTAGACAAAGACCATCTTGAACTATGCTGTACTCTCTCCTTGCCTTTCTCCTGGGCATGTTCTTGGGTGTTAGTGCTCAGACTATCCATCAATGGCCAGTTGCCGAGATCAAGGCTGTGGGCAGCCCACTGTCTCTGGGGTGTACCATAAAGGGGAAATCAAGCCCTAACCTCTACTGGTACTGGCAGGCCACAGGAGGCACCCTCCAGCAACTCTTCTACTCTATTACTGTTGGCCAGGTAGAGTCGGTGGTGCAACTGAACCTCTCAGCTTCCAGGCCGAAGGACGACCAATTCATCCTAAGCACGGAGAAGCTGCTTCTCAGCCACTCTGGCTTCTAC…	TGGGGATCTGGTGGTTTCTTCCAGCCCTCAAGGGGTAGACCTATGGGAGGGTCCTTTTTTGATATCCTGAAGCGTTTCTTATATGGGGAGTCTTGAGGTAGGAGGGGCCTGTGCATCTCTGGCTTAGAAAAGGAAGTACAAGTGCAGAGTAGACAAGCCTAGACAAAGACCATCTTGAACTATGCTGTACTCTCTCCTTGCCTTTCTCCTGGGCATGTTCTTGGGTGTTAGTGCTCAGACTATCCATCAATGGCCAGTTGCCGAGATCAAGGCTGTGGGCAGCCCACTGTCTCTGGGGTGTACCATAAAGGGGAAATCAAGCCCTAACCTCTACTGGTACTGGCAGGCCACAGGAGGCACCCTCCAGCAACTCTTCTACTCTATTACTGTTGGCCAGGT…
